# Supplementary material for: Association between markers of glucose metabolism and risk of colorectal cancer
Source: PubMed Central journal article supplement — BMJ Open. 2016 Jun 27;6(6):e011430. doi: 10.1136/bmjopen-2016-011430 (PMC4932260; doi:10.1136/bmjopen-2016-011430), 2016-06-27
Supplement: bmjopen-2016-011430supp.pdf [file bmjopen-2016-011430supp.pdf]

## Supplementary Files

### Supplementary methods

All the included studies divided the continuous variables (fasting glucose, fasting insulin, HbA1c, C-peptide and HOMA-IR) into categories and most of them provided risk ratios (if only cases numbers of different categories were provided, we recalculated the risk ratio). The cut-off values were listed in the supplementary excel table.

1) Fasting glucose. 18 studies were finally included which met the criteria (studies didn't provided detailed description for the blood glucose measurement were excluded, because we can't make sure it was fasting glucose or not). For the included 18 studies, 13 studies measured the fasting blood glucose level in a unit of "mg/dl" and 5 studies used "mmol/L". And we made transformations on those data in "mmol/L" with a formula "1 mmol/L=18mg/dl" for fasting blood glucose dose-response analysis. All studies except one (Hakozaki et al, 2013<sup>46</sup>) provided risk ratios on the different categories of fasting glucose level, while the number and cut-off value of categories varied among these included studies. Hakozaki et al<sup>46</sup> only provided the case number of different categories and we recalculated the risk ratio by a fourfold table chi square method (available at <http://vassarstats.net/odds2x2.html>).

2) Fasting insulin. 10 studies were finally included, and the unit of fasting insulin were different among these studies, such as "uIU/ml, uIU/dl, pmol/L, and mIU/L". And we made transformations on those data "1 pmol/L=6.965mIU/L=6.965uIU/L" for fasting blood insulin dose-response analysis.

3) HOMA-IR. 8 studies were included and 7 provided the category information and cut-off values, while Erarslan et al, 2014<sup>48</sup> only provided the odd ratio for this case-control study. HOMA-IR was calculated according to the formula fasting glucose (mmol/L) × fasting insulin (mIU/L) / 22.5.

4) HbA1c. 8 studies were included and all used "%" as unit of HbA1c. No additional recalculation was made.

5) C-peptide. 9 studies were included. Two reported c-peptide level by the unit "pmol/ml", and five used "ng/ml", and the rest two studies didn't provided the detailed category information. We made transformations on those data "1 pmol/ml=3.02ng/ml" for C-peptide dose-response analysis.

**Supplementary Table 1.** Characteristics of included studies.

| Study                              | Region | Design              | Gender | Age(years) | Cancer types and No. of participants   | Study quality | Adjustment for covariates                                                                                                      |
|------------------------------------|--------|---------------------|--------|------------|----------------------------------------|---------------|--------------------------------------------------------------------------------------------------------------------------------|
| Yamada et al,1998 <sup>17</sup>    | Japan  | case-control        | F/M    | 34-73      | CRC:129<br>control:258                 | 9             | age, sex, BMI, alcohol consumption                                                                                             |
| Platz et al,1999 <sup>18</sup>     | USA    | nested case-control | F      | 44-69      | CRC:79<br>control:156<br>cohort:121700 | 5             | year of birth, month of blood draw, and fasting state                                                                          |
| Schoen et al,1999 <sup>19</sup>    | USA    | cohort              | F/M    | 73.9(mean) | CRC:102<br>cohort:5849                 | 8             | age, sex and physical activity                                                                                                 |
| Kaaks et al,2000 <sup>20</sup>     | USA    | nested case-control | F      | 35-65      | CRC:102<br>control:200<br>cohort:14275 | 8             | age, menopausal status, day of menstrual cycle (for premenopausal women), and time of last food consumption and smoking status |
| Palmqvist et al,2003 <sup>21</sup> | Sweden | case-control        | F/M    | 30-70      | CC:110<br>RC:58<br>control:336         | 9             | age, sex, BMI, smoking, IGFBP levels                                                                                           |
| Saydah et al,2003 <sup>22</sup>    | USA    | case-control        | F/M    | >18        | CC:132<br>RC41<br>control:346          | 8             | age, sex, race, time since last meal, and date of blood draw                                                                   |
| Khaw et al,2004 <sup>23</sup>      | UK     | cohort              | F/M    | 45-79      | CRC:67<br>cohort:9605                  | 8             | sex, BMI, smoking habit                                                                                                        |
| Ma et al,2004 <sup>24</sup>        | USA    | nested case-control | M      | 40-84      | CRC:176<br>control:294<br>cohort:14916 | 7             | age, smoking status, fasting status, BMI, alcohol consumption, vigorous exercise, and aspirin assignment                       |
| Stattin et al                      | Norway | nested              | M      | 45(mean)   | CC:235                                 | 8             | leptin by adding it as continuous                                                                                              |

|                                  |    |         |                        |     |                     |                                             |   |                                                                                                                                                                                                                                                           |
|----------------------------------|----|---------|------------------------|-----|---------------------|---------------------------------------------|---|-----------------------------------------------------------------------------------------------------------------------------------------------------------------------------------------------------------------------------------------------------------|
| al,2004 <sup>25</sup>            |    |         | case-control           |     |                     | RC:143<br>control:378<br>cohort:600000      |   | variable to the model.                                                                                                                                                                                                                                    |
| Lin<br>al,2005 <sup>27</sup>     | et | USA     | cohort                 | F   | ≥45                 | CRC:168<br>cohort:27110                     | 7 | age, random treatment assignment, BMI, family history of CRC and colon polyps, physical activity, smoking status, red meat intake, alcohol consumption, total energy intake, multivitamin use, menopausal status, and baseline postmenopausal hormone use |
| Jee<br>al,2005 <sup>26</sup>     | et | Korea   | cohort                 | F/M | 30-95               | CRC:3352<br>cohort:829770men<br>468615women | 8 | age, age squared, amount of smoking, and alcohol use                                                                                                                                                                                                      |
| Wei<br>al,2005 <sup>28</sup>     | et | USA     | nested<br>case-control | F   | 30-55               | CRC:182<br>control:350<br>cohort:32826      | 7 | BMI, physical activity, pack-years smoked, and alcohol intake as continuous variables, family history of CRC, aspirin use, history of screening, menopausal status, and use of postmenopausal hormones                                                    |
| Chung<br>al,2006 <sup>29</sup>   | et | Korea   | case-control           | F/M | CRC58.4,control58.7 | CRC:105<br>control:105                      | 8 | age, sex, BMI, TG, cholesterol                                                                                                                                                                                                                            |
| Limburg<br>al,2006 <sup>30</sup> | et | Finland | nested<br>case-control | M   | 50-69               | CRC:139<br>control:399<br>cohort:29133      | 8 | cigarette pack-years, body mass index, protein intake, fat intake, fiber intake, alcohol consumption, caloric intake, history of diabetes mellitus                                                                                                        |

|                                  |    |                                       |                        |     |           |                                                                 |   |                                                                                                                                                                                                           |
|----------------------------------|----|---------------------------------------|------------------------|-----|-----------|-----------------------------------------------------------------|---|-----------------------------------------------------------------------------------------------------------------------------------------------------------------------------------------------------------|
| Rapp<br>al,2006 <sup>31</sup>    | et | Austrian                              | cohort                 | F/M |           | CRC:677<br>cohort:63585men<br>77228women                        | 8 | and occupational physical activity.<br>age, smoking status, occupational<br>group, and BMI                                                                                                                |
| Jenab<br>al,2007 <sup>32</sup>   | et | 10<br>European<br>countries           | nested<br>case-control | F/M | 36.7-76.9 | CRC:1078<br>control:1078<br>cohort:520000                       | 8 | Age, gender, BMI, physical activity,<br>laboratory analysis and case-control<br>status                                                                                                                    |
| Otani<br>al,2007 <sup>33</sup>   | et | Japan                                 | nested<br>case-control | F/M | 40-69     | CRC:375<br>control:750<br>cohort:38373                          | 8 | pack-years of smoking, alcohol<br>consumption, BMI, physical<br>exercise, family history of colorectal<br>cancer and following plasma<br>measurements mutually                                            |
| Stattin<br>al,2007 <sup>50</sup> | et | Sweden                                | cohort                 | F/M | 46(mean)  | CC:147<br>RC:87<br>cohort:64597                                 | 8 | age, calendar year, smoking                                                                                                                                                                               |
| Gunter<br>al,2008 <sup>34</sup>  | et | USA                                   | nested<br>case-control | F   | 50-79     | CRC:438<br>control:816<br>cohort:93676                          | 8 | age                                                                                                                                                                                                       |
| Rinaldi<br>al,2008 <sup>35</sup> | et | 10 European<br>countries <sup>#</sup> | nested<br>case-control | F/M | 35-69     | CRC:1026<br>control:1026<br>cohort:<br>370000women<br>150000men | 8 | gender, age at blood donation, time<br>of the day at blood donation,<br>follow-up time, fasting status and, in<br>women, menopausal status and<br>phase of the menstrual cycle for<br>premenopausal women |
| Stocks<br>al,2008 <sup>36</sup>  | et | Sweden                                | nested<br>case-control | F/M | 50-70     | CRC:306<br>control:595                                          | 8 | case-control status, sex, age,<br>smoking status and fasting time                                                                                                                                         |

|                                   |    |                                  |                        |     |                                                        |                                                                            |   |                                                                                                                                                                                                                            |
|-----------------------------------|----|----------------------------------|------------------------|-----|--------------------------------------------------------|----------------------------------------------------------------------------|---|----------------------------------------------------------------------------------------------------------------------------------------------------------------------------------------------------------------------------|
| Stocks<br>al,2009 <sup>37</sup>   | et | Norway,<br>Austria and<br>Sweden | cohort                 | F/M | 44.8(mean)                                             | cohort:104461<br>CC:2434<br>RC:1345<br>cohort:<br>274126men<br>275818women | 9 | before blood draw<br>adjusted for baseline age, BMI, and<br>smoking status                                                                                                                                                 |
| Nakajima<br>al,2010 <sup>38</sup> | et | Japan                            | case-control           | F/M | CRC:63.7,cotrol:63.5                                   | CRC:115<br>control:115                                                     | 8 | age, gender, BMI, tumor stage and<br>tumor location                                                                                                                                                                        |
| Yamamoto<br>al,2010 <sup>39</sup> | et | Japan                            | case-control           | F/M | 53.8(mean)                                             | CRC:22<br>control:66                                                       | 8 | BMI, smoking and drinking                                                                                                                                                                                                  |
| Stocks<br>al,2011 <sup>40</sup>   | et | Norway                           | cohort                 | F/M | 44(mean)                                               | CRC:4695<br>cohort:578500                                                  | 8 | baseline age, birth year, smoking<br>status, and quintiles of BMI                                                                                                                                                          |
| Wu<br>al,2011 <sup>41</sup>       | et | USA                              | nested<br>case-control | M   | 40-75                                                  | CRC:499<br>control:992                                                     | 9 | age, gender, BMI, month of blood<br>donation, smoking status, physical<br>activity, intake of alcohol,<br>methionine, folate, retinol, red and<br>processed meat, calcium intake,<br>family history of CRC, fasting status |
| Chen<br>al,2012 <sup>42</sup>     | et | China                            | case-control           | M   | early cancer62.1<br>advanced cancer61.8<br>control58.3 | CRC:165<br>control:102                                                     | 7 | age, BMI, WHR, SBP, TG, total<br>adiponectin, fasting insulin,<br>HOMA-IR, HMW adiponectin,<br>lifestyle characteristics, medications,<br>family history of CRC and diabetes                                               |
| Dankner<br>al,2012 <sup>43</sup>  | et | Four<br>region <sup>*</sup>      | cohort                 | F/M | 51.8(mean)                                             | CRC:44<br>cohort:1695                                                      | 9 | age, sex, and ethnicity                                                                                                                                                                                                    |
| Kabat                             | et | UK                               | nested                 | F   | 50-79                                                  | CRC:81                                                                     | 8 | age, BMI, alcohol intake, physical                                                                                                                                                                                         |

|                                      |        |  |                     |     |                   |                                           |   |                                                                                                                                                                                                                                     |
|--------------------------------------|--------|--|---------------------|-----|-------------------|-------------------------------------------|---|-------------------------------------------------------------------------------------------------------------------------------------------------------------------------------------------------------------------------------------|
| al,2012 <sup>49</sup>                |        |  | case-control        |     |                   | control:4821<br>cohort:4902               |   | activity, family history of colorectal cancer, ethnicity, and participation in the OS or treatment arm of each clinical trial.                                                                                                      |
| Ollberding et al,2012 <sup>44</sup>  | USA    |  | nested case-control | F/M | 45-75             | CRC:1954<br>control:2587<br>cohort:215000 | 8 | age, sex, race/ethnicity, history of colorectal polyp, family history of colorectal cancer, BMI, physical activity, processed meat intake, pack-years of smoking, alcohol consumption, and mutual adjustment for IGF-I and IGFBP-3, |
| Wulaningsih et al,2012 <sup>45</sup> | Sweden |  | cohort              | F/M | 43.84(mean)       | CC:2472<br>RC:1510<br>cohort:540309       | 8 | glucose, TC and TG levels, age, gender, SES, and fasting status                                                                                                                                                                     |
| Hakozaki et al,2013 <sup>46</sup>    | Japan  |  | case-control        | F/M | 48(mean)          | CRC:29<br>control:440                     | 7 | age, gender, cholesterol, triglyceride, uric acid                                                                                                                                                                                   |
| Parekh et al,2013 <sup>47</sup>      | USA    |  | cohort              | F/M | 66.8(mean)        | CRC:136<br>cohort:4615                    | 8 | age, sex, alcohol, smoking, BMI, smoking status                                                                                                                                                                                     |
| Erarslan et al,2014 <sup>48</sup>    | Turkey |  | case-control        | F/M | CRC58,control52.9 | CRC:21<br>control:30                      | 9 | age, BMI, VFA, serum IGF-1, fasting insulin and glucose                                                                                                                                                                             |
| Shin et al,2014 <sup>51</sup>        | Korea  |  | cohort              | F/M | 42(mean)          | CRC:320<br>cohort:175677                  | 9 | age, sex, body mass index, smoking, alcohol drinking, and regular exercise                                                                                                                                                          |

Nr: not reported;

#: Denmark, France, Germany, Greece, Italy, Norway, Spain, Sweden, the Netherlands, and the United Kingdom;

\*: European-American, North African, Yemenite, and Other Middle Eastern.

Study quality was judged on the basis of the Newcastle-Ottawa Scale (1-9 stars)

**Supplementary Table 2.** Quality assessment of case-control studies.

| <b>Study</b>          | <b>Q1</b> | <b>Q2</b> | <b>Q3</b> | <b>Q4</b> | <b>Q5</b> | <b>Q6</b> | <b>Q7</b> | <b>Q8</b> | <b>Quality</b> |
|-----------------------|-----------|-----------|-----------|-----------|-----------|-----------|-----------|-----------|----------------|
| Yamada et al,1998     | a         | a         | a         | a         | ab        | a         | a         | a         | 9              |
| Platz et al,1999      | c         | b         | b         | b         | ab        | a         | a         | a         | 5              |
| Kaaks et al,2000      | c         | a         | a         | a         | ab        | a         | a         | a         | 8              |
| Palmqvist et al,2003  | a         | a         | a         | a         | ab        | a         | a         | a         | 9              |
| Saydah et al,2003     | b         | a         | a         | a         | ab        | a         | a         | a         | 8              |
| Ma et al,2004         | a         | b         | b         | a         | ab        | a         | a         | a         | 7              |
| Stattin et al,2004    | b         | a         | a         | a         | ab        | a         | a         | a         | 8              |
| Wei et al,2005        | a         | b         | b         | a         | ab        | a         | a         | a         | 7              |
| Chung et al,2006      | a         | a         | b         | a         | ab        | a         | a         | a         | 8              |
| Limburg et al,2006    | b         | a         | a         | a         | ab        | a         | a         | a         | 8              |
| Jenab et al,2007      | b         | a         | a         | a         | ab        | a         | a         | a         | 8              |
| Otani et al,2007      | b         | a         | a         | a         | ab        | a         | a         | a         | 8              |
| Gunter et al,2008     | b         | a         | a         | a         | ab        | a         | a         | a         | 8              |
| Rinaldi et al,2008    | b         | a         | a         | a         | ab        | a         | a         | a         | 8              |
| Stocks et al,2008     | b         | a         | a         | a         | ab        | a         | a         | a         | 8              |
| Nakajima et al,2010   | a         | a         | b         | a         | ab        | a         | a         | a         | 8              |
| Yamamoto et al,2010   | a         | a         | b         | a         | ab        | a         | a         | a         | 8              |
| Wu et al,2011         | a         | a         | a         | a         | ab        | a         | a         | a         | 9              |
| Chen et al,2012       | a         | a         | b         | a         | a         | a         | a         | a         | 7              |
| Kabat et al,2012      | a         | a         | a         | b         | ab        | a         | a         | a         | 8              |
| Ollberding et al,2012 | b         | a         | a         | a         | ab        | a         | a         | a         | 8              |

|                     |   |   |   |   |    |   |   |   |   |
|---------------------|---|---|---|---|----|---|---|---|---|
| Hakozaki et al,2013 | c | a | b | a | ab | a | a | a | 7 |
| Erarslan et al,2014 | a | a | a | a | ab | a | a | a | 9 |

Q1: Is the case definition adequate?

a) yes, with independent validation  b) yes, eg record linkage or based on self-reports c) no description

Q2: Representativeness of the cases

a) consecutive or obviously representative series of cases  b) potential for selection biases or not stated

Q3: Selection of Controls

a) community controls  b) hospital controls c) no description

Q4: Definition of Controls

a) no history of disease (endpoint)  b) no description of source

Q5: Comparability of cases and controls on the basis of the design or analysis

a) study controls for age  b) study controls for any additional factor

Q6: Ascertainment of exposure

a) secure record  b) structured interview where blind to case/control status

c) interview not blinded to case/control status d) written self-report or medical record only

e) no description

Q7: Same method of ascertainment for cases and controls

a) yes  b) no

Q8: Non-Response rate

a) same rate for both groups  b) non respondents described c) rate different and no designation

**Supplementary Table 3.** Quality assessment of cohort studies.

| Study             | Q1 | Q2 | Q3 | Q4 | Q5 | Q6 | Q7 | Q8 | Quality |
|-------------------|----|----|----|----|----|----|----|----|---------|
| Schoen et al,1999 | b  | a  | a  | a  | a  | b  | a  | b  | 8       |



|                        |   |   |   |   |    |   |   |   |   |
|------------------------|---|---|---|---|----|---|---|---|---|
| Khaw et al,2004        | a | a | a | a | a  | b | a | b | 8 |
| Lin et al,2005         | a | a | a | a | ab | d | a | d | 7 |
| Jee et al,2005         | a | a | a | a | a  | a | a | b | 8 |
| Rapp et al,2006        | a | a | a | a | a  | b | a | b | 8 |
| Stattin et al,2007     | a | a | a | a | ab | d | a | b | 8 |
| Stocks et al,2009      | a | a | a | a | ab | b | a | b | 9 |
| Stocks et al,2011      | a | a | a | a | a  | b | a | b | 8 |
| Dankner et al,2012     | a | a | a | a | ab | b | a | b | 9 |
| Wulaningsih et al,2012 | a | a | a | a | a  | b | a | b | 8 |
| Parekh et al,2013      | a | a | a | a | a  | b | a | b | 8 |
| Shin et al,2014        | a | a | a | a | ab | b | a | b | 9 |

Q1: Representativeness of the exposed cohort

- a) truly representative of the average population in the community  b) somewhat representative of the average population in the community   
c) selected group of users  d) no description of the derivation of the cohort

Q2: Selection of the non exposed cohort

- a) drawn from the same community as the exposed cohort  b) drawn from a different source   
c) no description of the derivation of the non-exposed cohort

Q3: Ascertainment of exposure

- a) secure record  b) structured interview   
c) written self-report  d) no description

Q4: Demonstration that outcome of interest was not present at start of study

- a) yes  b) no

Q5: Comparability of cohorts on the basis of the design or analysis

- a) study controls for age  b) study controls for any additional factor Outcome

Q6: Assessment of outcome

- a) independent blind assessment  b) record linkage

c) self-report

d) no description

Q7: Was follow-up long enough for outcomes to occur

a) yes  b) no

Q8: Adequacy of follow up of cohorts

a) complete follow up - all subjects accounted for

b) subjects lost to follow up unlikely to introduce bias - small number lost > 70 % follow up, or description provided of those lost

c) follow up rate < 70% and no description of those lost

d) no statement

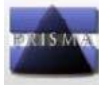

## Supplementary Table 4: PRISMA 2009 Checklist and PRISMA Flow diagram

| Section/topic                      | #  | Checklist item                                                                                                                                                                                                                                                                                              | Reported on page # |
|------------------------------------|----|-------------------------------------------------------------------------------------------------------------------------------------------------------------------------------------------------------------------------------------------------------------------------------------------------------------|--------------------|
| <b>TITLE</b>                       |    |                                                                                                                                                                                                                                                                                                             |                    |
| Title                              | 1  | Identify the report as a systematic review, meta-analysis, or both.                                                                                                                                                                                                                                         | 1-2                |
| <b>ABSTRACT</b>                    |    |                                                                                                                                                                                                                                                                                                             |                    |
| Structured summary                 | 2  | Provide a structured summary including, as applicable: background; objectives; data sources; study eligibility criteria, participants, and interventions; study appraisal and synthesis methods; results; limitations; conclusions and implications of key findings; systematic review registration number. | 3-4                |
| <b>INTRODUCTION</b>                |    |                                                                                                                                                                                                                                                                                                             |                    |
| Rationale                          | 3  | Describe the rationale for the review in the context of what is already known.                                                                                                                                                                                                                              | 5                  |
| Objectives                         | 4  | Provide an explicit statement of questions being addressed with reference to participants, interventions, comparisons, outcomes, and study design (PICOS).                                                                                                                                                  | 5-6                |
| <b>METHODS</b>                     |    |                                                                                                                                                                                                                                                                                                             |                    |
| Protocol and registration          | 5  | Indicate if a review protocol exists, if and where it can be accessed (e.g., Web address), and, if available, provide registration information including registration number.                                                                                                                               | 6                  |
| Eligibility criteria               | 6  | Specify study characteristics (e.g., PICOS, length of follow-up) and report characteristics (e.g., years considered, language, publication status) used as criteria for eligibility, giving rationale.                                                                                                      | 6-7                |
| Information sources                | 7  | Describe all information sources (e.g., databases with dates of coverage, contact with study authors to identify additional studies) in the search and date last searched.                                                                                                                                  | 6                  |
| Search                             | 8  | Present full electronic search strategy for at least one database, including any limits used, such that it could be repeated.                                                                                                                                                                               | 6                  |
| Study selection                    | 9  | State the process for selecting studies (i.e., screening, eligibility, included in systematic review, and, if applicable, included in the meta-analysis).                                                                                                                                                   | 6                  |
| Data collection process            | 10 | Describe method of data extraction from reports (e.g., piloted forms, independently, in duplicate) and any processes for obtaining and confirming data from investigators.                                                                                                                                  | 7                  |
| Data items                         | 11 | List and define all variables for which data were sought (e.g., PICOS, funding sources) and any assumptions and simplifications made.                                                                                                                                                                       | 7                  |
| Risk of bias in individual studies | 12 | Describe methods used for assessing risk of bias of individual studies (including specification of whether this was done at the study or outcome level), and how this information is to be used in any data synthesis.                                                                                      | 8                  |
| Summary measures                   | 13 | State the principal summary measures (e.g., risk ratio, difference in means).                                                                                                                                                                                                                               | 7-8                |
| Synthesis of results               | 14 | Describe the methods of handling data and combining results of studies, if done, including measures of consistency (e.g., $I^2$ ) for each meta-analysis.                                                                                                                                                   | 7-8                |

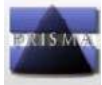

## Supplementary Table 4: PRISMA 2009 Checklist and PRISMA Flow diagram

| Section/topic                 | #  | Checklist item                                                                                                                                                                                           | Reported on page # |
|-------------------------------|----|----------------------------------------------------------------------------------------------------------------------------------------------------------------------------------------------------------|--------------------|
| Risk of bias across studies   | 15 | Specify any assessment of risk of bias that may affect the cumulative evidence (e.g., publication bias, selective reporting within studies).                                                             | 8                  |
| Additional analyses           | 16 | Describe methods of additional analyses (e.g., sensitivity or subgroup analyses, meta-regression), if done, indicating which were pre-specified.                                                         | 8                  |
| <b>RESULTS</b>                |    |                                                                                                                                                                                                          |                    |
| Study selection               | 17 | Give numbers of studies screened, assessed for eligibility, and included in the review, with reasons for exclusions at each stage, ideally with a flow diagram.                                          | 9                  |
| Study characteristics         | 18 | For each study, present characteristics for which data were extracted (e.g., study size, PICOS, follow-up period) and provide the citations.                                                             | 9-10               |
| Risk of bias within studies   | 19 | Present data on risk of bias of each study and, if available, any outcome level assessment (see item 12).                                                                                                | 13                 |
| Results of individual studies | 20 | For all outcomes considered (benefits or harms), present, for each study: (a) simple summary data for each intervention group (b) effect estimates and confidence intervals, ideally with a forest plot. | 9-13               |
| Synthesis of results          | 21 | Present the main results of the review. If meta-analyses are done, include for each, confidence intervals and measures of consistency                                                                    | 9-13               |
| Risk of bias across studies   | 22 | Present results of any assessment of risk of bias across studies (see Item 15).                                                                                                                          | 13                 |
| Additional analysis           | 23 | Give results of additional analyses, if done (e.g., sensitivity or subgroup analyses, meta-regression [see Item 16]).                                                                                    | 9-13               |
| <b>DISCUSSION</b>             |    |                                                                                                                                                                                                          |                    |
| Summary of evidence           | 24 | Summarize the main findings including the strength of evidence for each main outcome; consider their relevance to key groups (e.g., healthcare providers, users, and policy makers).                     | 13-17              |
| Limitations                   | 25 | Discuss limitations at study and outcome level (e.g., risk of bias), and at review-level (e.g., incomplete retrieval of identified research, reporting bias).                                            | 17-18              |
| Conclusions                   | 26 | Provide a general interpretation of the results in the context of other evidence, and implications for future research.                                                                                  | 18                 |
| <b>FUNDING</b>                |    |                                                                                                                                                                                                          |                    |
| Funding                       | 27 | Describe sources of funding for the systematic review and other support (e.g., supply of data); role of funders for the systematic review.                                                               | 18-19              |

From: Moher D, Liberati A, Tetzlaff J, Altman DG, The PRISMA Group (2009). Preferred Reporting Items for Systematic Reviews and Meta-Analyses: The PRISMA Statement. PLoS Med 6(6): e1000097. doi:10.1371/journal.pmed1000097

For more information, visit: [www.prisma-statement.org](http://www.prisma-statement.org).

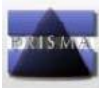

# Supplementary Table 4: PRISMA 2009 Checklist and PRISMA Flow diagram

## Flow Diagram

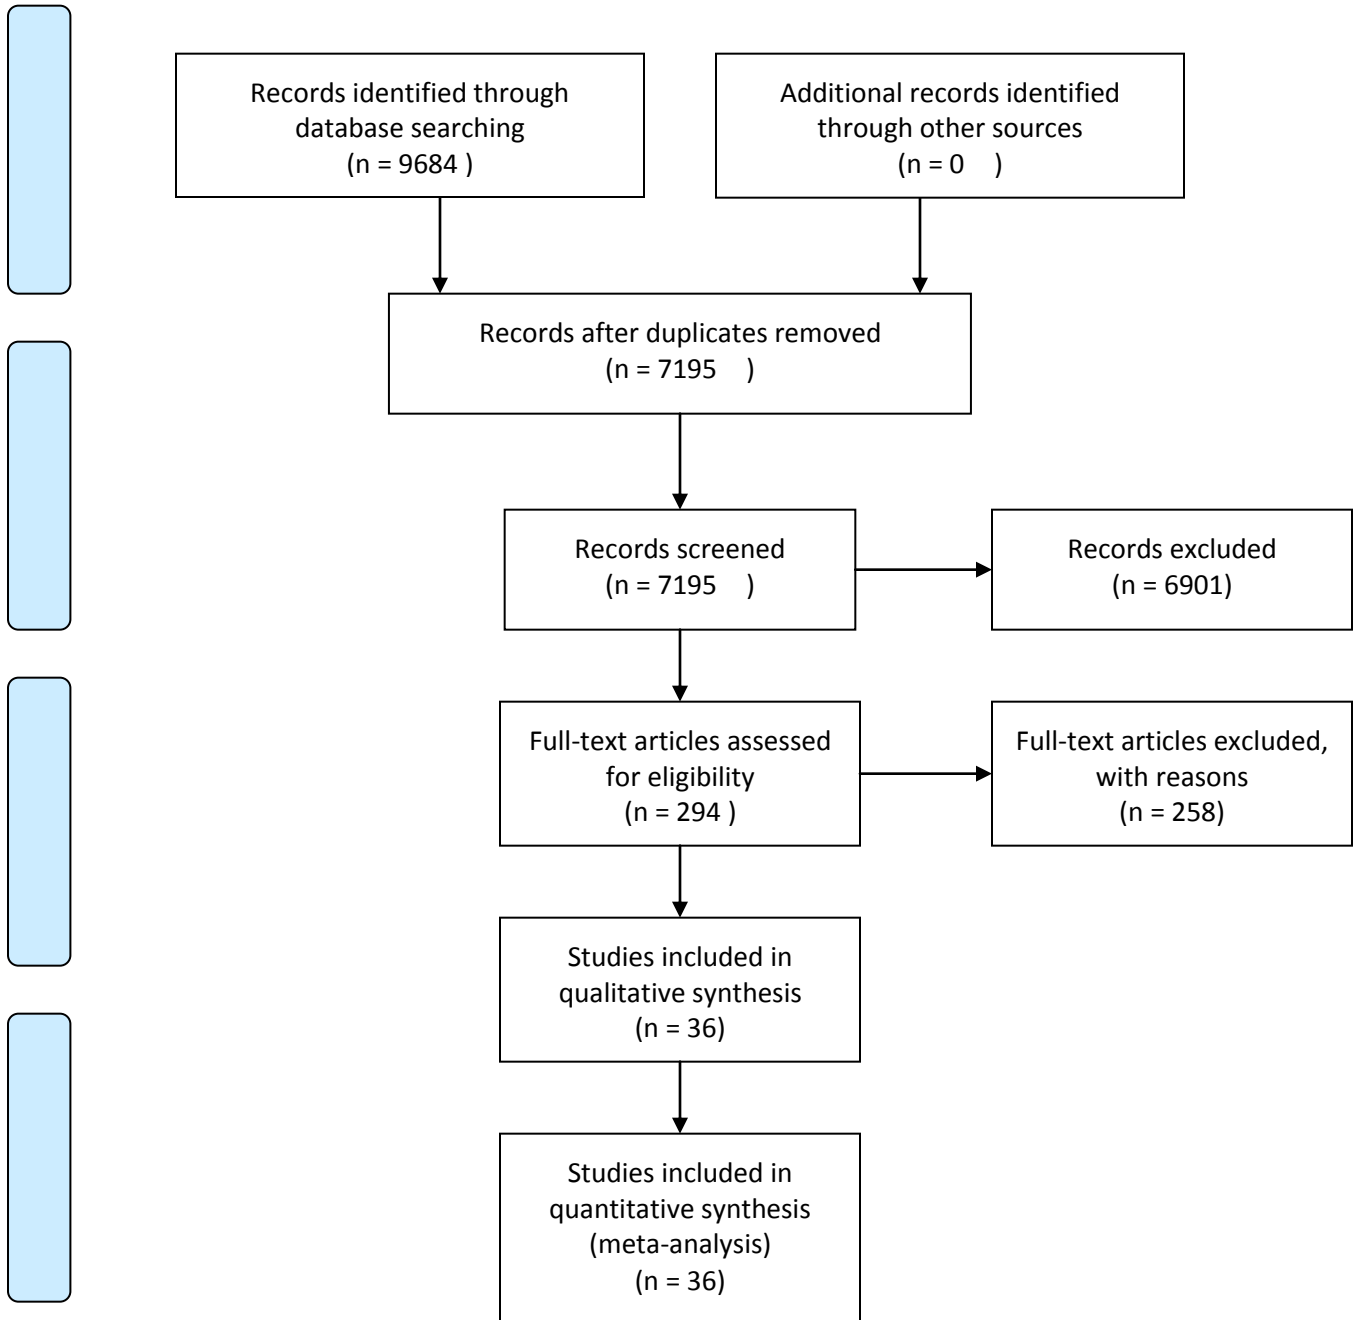

From: Moher D, Liberati A, Tetzlaff J, Altman DG, The PRISMA Group (2009). Preferred Reporting Items for Systematic Reviews and Meta-Analyses: The PRISMA Statement. PLoS Med 6(6): e1000097. doi:10.1371/journal.pmed1000097

For more information, visit [www.prisma-statement.org](http://www.prisma-statement.org).
