# Supplementary material for: Association between markers of glucose metabolism and risk of colorectal cancer
Source: PubMed Central journal article supplement — BMJ Open. 2016 Jun 27;6(6):e011430. doi: 10.1136/bmjopen-2016-011430 (PMC4932260; doi:10.1136/bmjopen-2016-011430), 2016-06-27

**Supplementary Figure 1.** Funnel plot for publication bias test for fasting glucose.

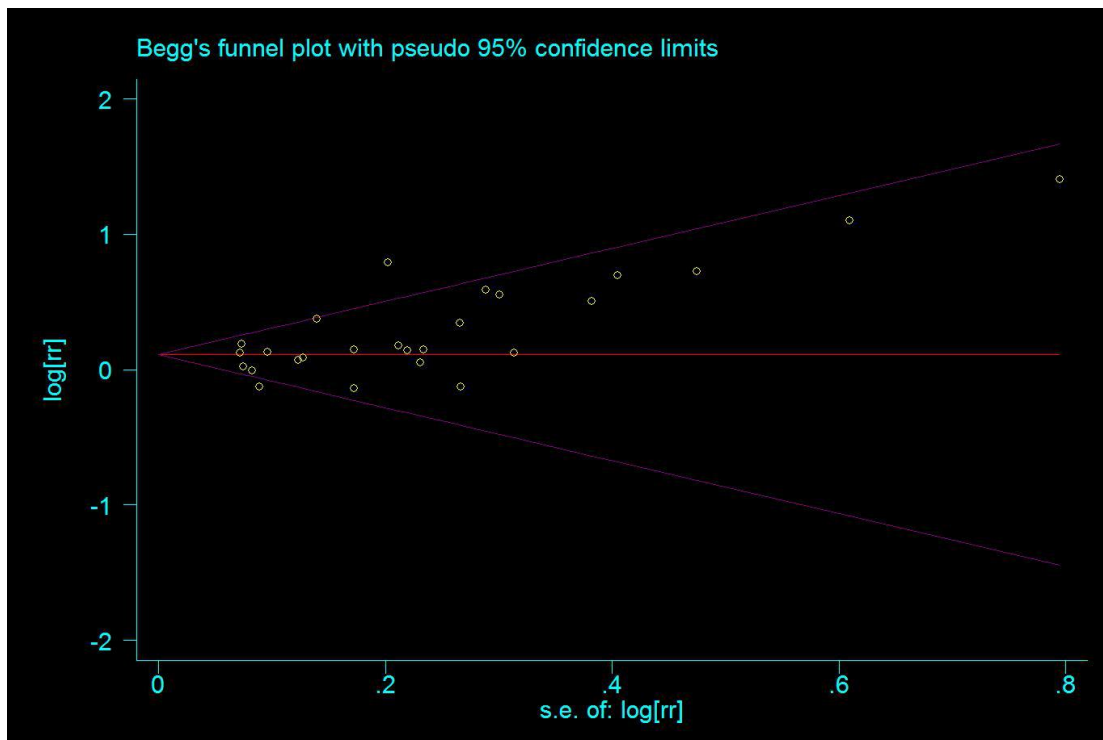

**Supplementary Figure 2.** Funnel plot for publication bias test for fasting insulin.

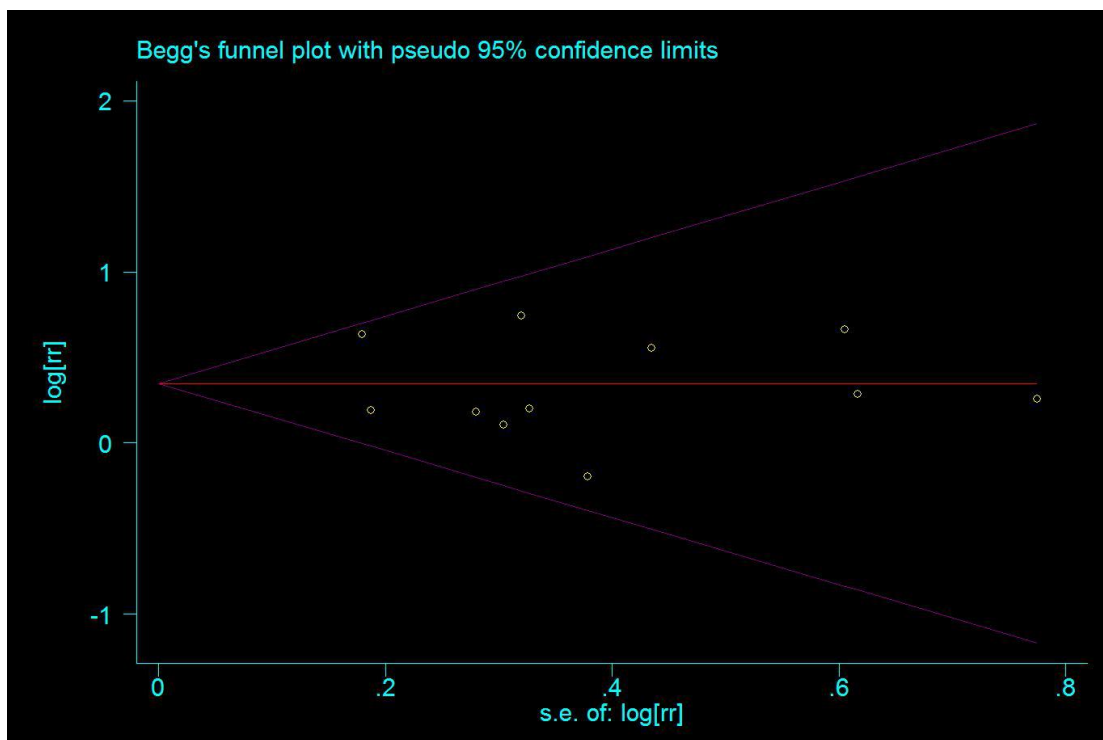

**Supplementary Figure 3.** Funnel plot for publication bias test for HOMA-IR.

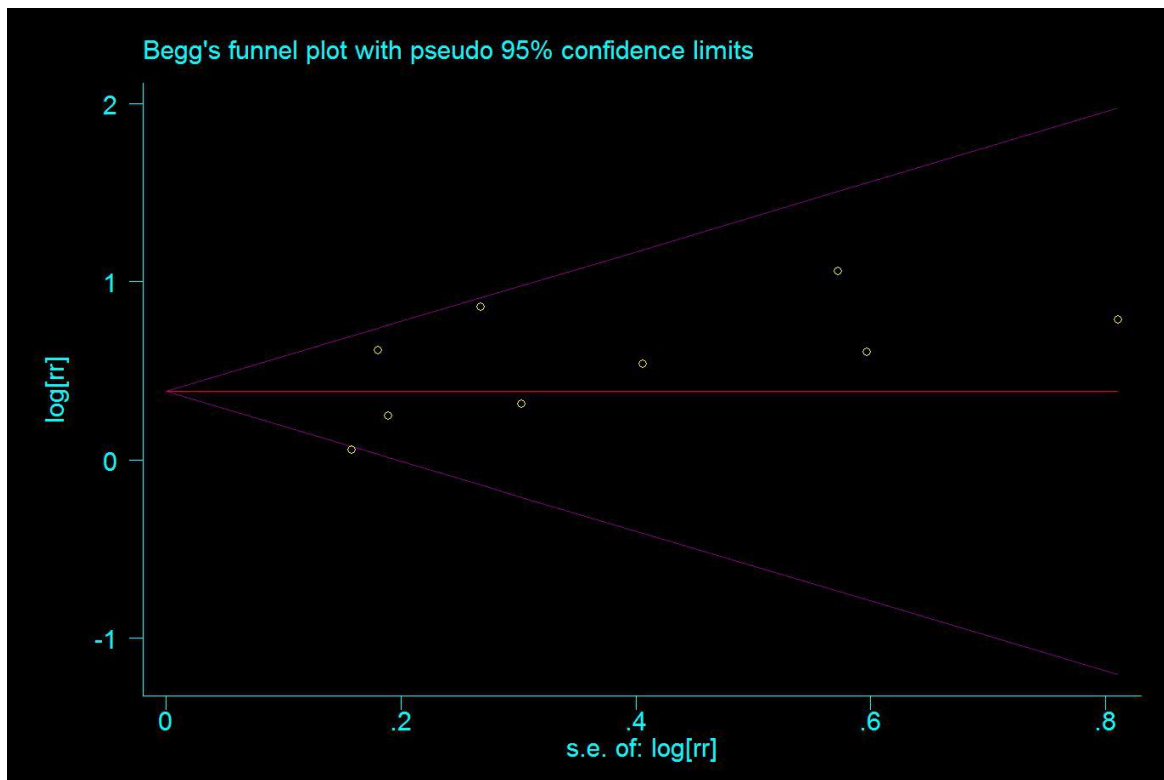

**Supplementary Figure 4.** Funnel plot for publication bias test for HbA1c.

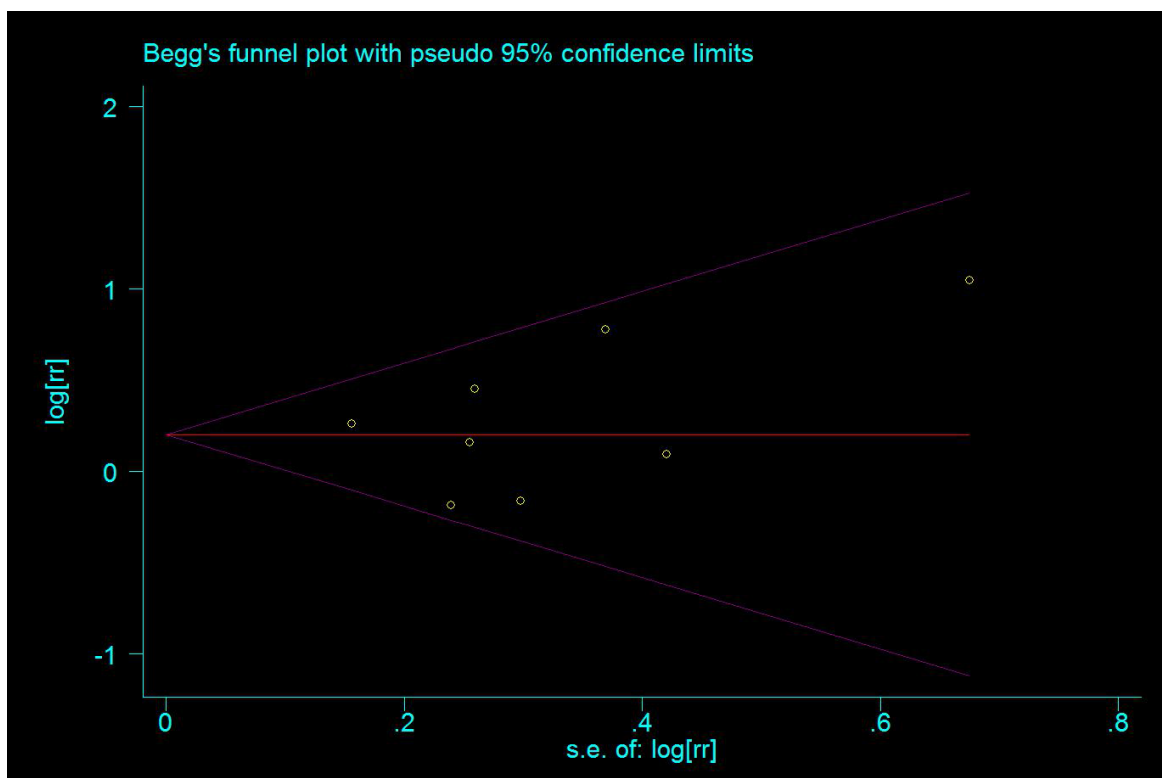

Supplementary Figure 5. Funnel plot for publication bias test for C-peptide.

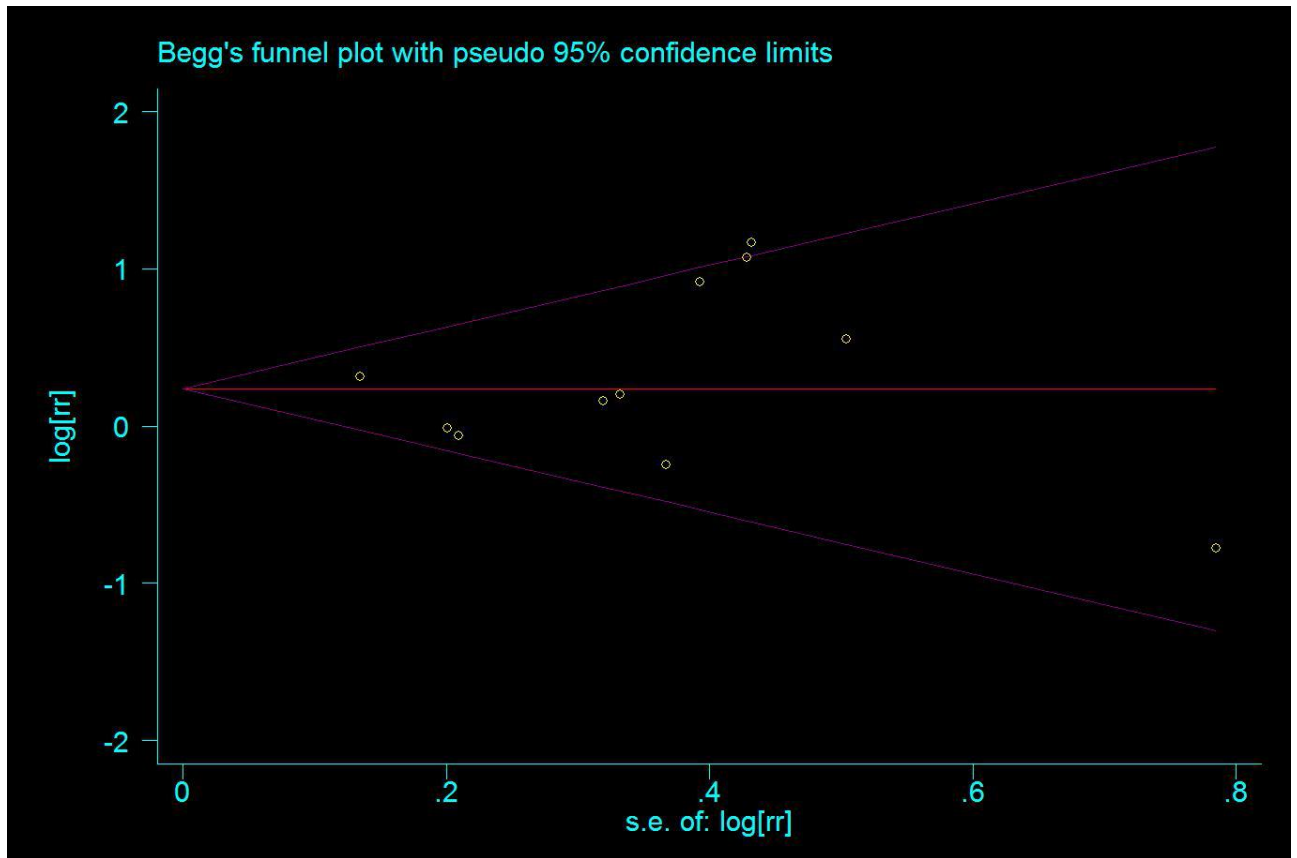

**Supplementary Figure 6.** Possible mechanisms linking diabetes and colorectal carcinogenesis. Abbreviations: ROS: reactive oxygen species; TNF $\alpha$ : tumor Necrosis Factor; NF- $\kappa$ B nuclear factor- $\kappa$ B; STAT 3: signal transducers and activators of transcription; IR: insulin receptor; IGF-1R: insulin-like growth factor 1 receptor; PI3K: phosphatidylinositol-3-kinase; MEK: Mitogen extracellular kinases; ERK: Extracellular signal-regulated kinases; mTOR: Mammalian target of rapamycin; Ras: “Rapid accelerating sarcoma” serine/threonine-kinase; Raf: “Rapid accelerating fibrosarcoma” serine/threonine-kinase; GLP-1: hormone glucagon-like peptide.

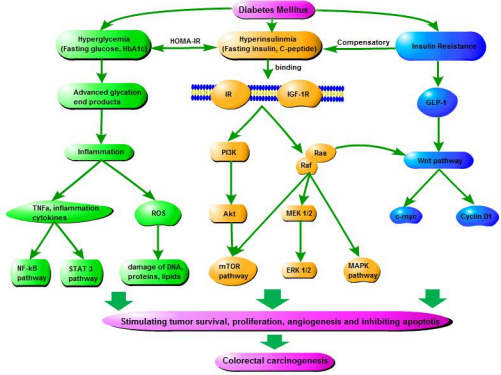

Supplement: bmjopen-2016-011430supp_figures.pdf [file bmjopen-2016-011430supp_figures.pdf]
