# Supplementary material for: Association between markers of glucose metabolism and risk of colorectal cancer
Source: PubMed Central journal article supplement — BMJ Open. 2016 Jun 27;6(6):e011430. doi: 10.1136/bmjopen-2016-011430 (PMC4932260; doi:10.1136/bmjopen-2016-011430), 2016-06-27
Supplement: bmjopen-2016-011430supp_table.pdf [file bmjopen-2016-011430supp_table.pdf]

# Fasting glucose

| Study | Country | Design       | Gender | Age (years) | Sample size (n) | Outcome         | Notes                   |
|-------|---------|--------------|--------|-------------|-----------------|-----------------|-------------------------|
| 1     | USA     | Case-control | Both   | 45-75       | 1,000           | fasting glucose | Adjusted for covariates |
| 2     | USA     | Case-control | Both   | 45-75       | 1,000           | fasting glucose | Adjusted for covariates |
| 3     | USA     | Case-control | Both   | 45-75       | 1,000           | fasting glucose | Adjusted for covariates |
| 4     | USA     | Case-control | Both   | 45-75       | 1,000           | fasting glucose | Adjusted for covariates |
| 5     | USA     | Case-control | Both   | 45-75       | 1,000           | fasting glucose | Adjusted for covariates |
| 6     | USA     | Case-control | Both   | 45-75       | 1,000           | fasting glucose | Adjusted for covariates |
| 7     | USA     | Case-control | Both   | 45-75       | 1,000           | fasting glucose | Adjusted for covariates |
| 8     | USA     | Case-control | Both   | 45-75       | 1,000           | fasting glucose | Adjusted for covariates |
| 9     | USA     | Case-control | Both   | 45-75       | 1,000           | fasting glucose | Adjusted for covariates |
| 10    | USA     | Case-control | Both   | 45-75       | 1,000           | fasting glucose | Adjusted for covariates |
| 11    | USA     | Case-control | Both   | 45-75       | 1,000           | fasting glucose | Adjusted for covariates |
| 12    | USA     | Case-control | Both   | 45-75       | 1,000           | fasting glucose | Adjusted for covariates |
| 13    | USA     | Case-control | Both   | 45-75       | 1,000           | fasting glucose | Adjusted for covariates |
| 14    | USA     | Case-control | Both   | 45-75       | 1,000           | fasting glucose | Adjusted for covariates |
| 15    | USA     | Case-control | Both   | 45-75       | 1,000           | fasting glucose | Adjusted for covariates |
| 16    | USA     | Case-control | Both   | 45-75       | 1,000           | fasting glucose | Adjusted for covariates |
| 17    | USA     | Case-control | Both   | 45-75       | 1,000           | fasting glucose | Adjusted for covariates |
| 18    | USA     | Case-control | Both   | 45-75       | 1,000           | fasting glucose | Adjusted for covariates |

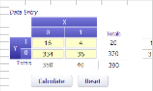

# Fasting insulin

| Study | Country             | Design                         | Gender | Age(years) | Cancer types and No. of cases/controls/cohort | Unit of fasting insulin | Adjustment for covariates                                                                                                                                                                                                                        |
|-------|---------------------|--------------------------------|--------|------------|-----------------------------------------------|-------------------------|--------------------------------------------------------------------------------------------------------------------------------------------------------------------------------------------------------------------------------------------------|
| 1     | Schoen et al 1999   | USA<br>cohort                  | FM     | 71.9(mean) | CRC 102, cohort 5849                          | μmol/L                  | age, sex and physical activity                                                                                                                                                                                                                   |
| 2     | Palmer et al 2003   | Sweden<br>case-control         | FM     | 36.76      | CRC 108, CR, cohort 136                       | pmol/L                  | age, sex, BMI, smoking, IGFBP levels                                                                                                                                                                                                             |
| 3     | Lambert et al 2006  | Finland<br>nested case-control | M      | 60.49      | CRC 139, cohort 399, cohort 2013              | μmol/L                  | cigarette pack-years, body mass index, protein intake, fat intake, fiber intake, alcohol consumption, caloric intake, history of diabetes mellitus and occupational physical activity                                                            |
| 4     | Chen et al 2012     | USA<br>case-control            | F      | 51.8(mean) | CRC 132, cohort 66                            | μmol/L                  | age                                                                                                                                                                                                                                              |
| 5     | Yamamoto et al 2010 | Japan<br>case-control          | FM     | 61.8(mean) | CRC 125, cohort 66                            | μmol/L                  | BMI, smoking and drinking                                                                                                                                                                                                                        |
| 6     | Dubler et al 2012   | China<br>cohort                | M      | 51.8(mean) | CRC 165, cohort 102                           | μmol/L                  | age, BMI, WHR, SBP, TG, fasting insulin, HOMA-IR, total adiponectin, HMW adiponectin, lifestyle characteristics, medications, family history of CRC and diabetes                                                                                 |
| 7     | Kabat et al 2012    | UK<br>nested case-control      | F      | 60.76      | CRC 41, cohort 4821, cohort #902              | μmol/L                  | Adjusted for age, sex, and ethnicity                                                                                                                                                                                                             |
| 8     | Othman et al 2012   | USA<br>nested case-control     | FM     | 45.75      | CRC 194, cohort 2192, cohort 21500            | μmol/L                  | Adjusted for age, sex, race/ethnicity, history of colorectal polyps, family history of colorectal cancer, BMI, physical activity, processed meat intake, pack-years of smoking, alcohol consumption, and mutual adjustment for IGF-1 and IGFBP-3 |
| 9     | Parkh et al 2013    | USA<br>cohort                  | FM     | 66.8(mean) | CRC 136, cohort 4615                          | pmol/L                  | age, sex, alcohol, smoking, BMI, smoking status                                                                                                                                                                                                  |

  

| Study | Country       | Design                                                   | Gender | Age(years)               | Cancer types and No. of cases/controls/cohort | Unit of fasting insulin | Adjustment for covariates                                                                                                                                                                                                                                                                                     |
|-------|---------------|----------------------------------------------------------|--------|--------------------------|-----------------------------------------------|-------------------------|---------------------------------------------------------------------------------------------------------------------------------------------------------------------------------------------------------------------------------------------------------------------------------------------------------------|
| 1     | Schoen/1999   | USA<br>102CRC, 5849cohort                                | FM     | 71.9(mean)               | CRC 102, cohort 5849                          | μmol/L                  | age, sex and physical activity                                                                                                                                                                                                                                                                                |
| 2     | Palmer/et2003 | Sweden<br>168CRC(110CC,58CR),336controls                 | FM     | 36.76                    | CRC 108, CR, cohort 136                       | pmol/L                  | age, sex, BMI, smoking, IGFBP-1 AND IGFBP-2                                                                                                                                                                                                                                                                   |
| 3     | Lambert/2006  | Finland<br>134CRC, 399controls, 29,133men                | M      | 60.49                    | CRC 139, cohort 399, cohort 2013              | μmol/L                  | age, BMI, WHR, SBP, TG, fasting insulin, HOMA-IR, total adiponectin, HMW adiponectin, lifestyle characteristics, medications, family history of CRC and diabetes                                                                                                                                              |
| 4     | Gunter/2008   | USA<br>19376 women, 438CRC, 81controls                   | F      | age60-70                 | CRC 438, cohort 81                            | μmol/L                  | Adjusted for age only                                                                                                                                                                                                                                                                                         |
| 5     | Yamamoto/2010 | Japan<br>22CRC, 66controls                               | FM     | 61.8                     | CRC 125, cohort 66                            | μmol/L                  | Adjusted for smoking and alcohol drinking                                                                                                                                                                                                                                                                     |
| 6     | Chen/2012     | China<br>71early cancer, 94advanced cancer, 102control   | F      | 51.8                     | CRC 132, cohort 66                            | μmol/L                  | Adjusted for age, BMI, WHR, SBP, TG, fasting insulin, HOMA-IR, total adiponectin, HMW adiponectin, lifestyle characteristics, medications, family history of CRC and diabetes                                                                                                                                 |
| 7     | Danker/2012   | USA<br>165cohort                                         | FM     | age 61, follow up 27 yr  | CRC 165, cohort 165                           | μmol/L                  | Adjusted for age, sex, (except for breast and prostate cancers), and ethnicity                                                                                                                                                                                                                                |
| 8     | Kabat/2012    | UK<br>4902 women, 81CRC, 11.9years follow up, 482control | F      | age 64, 3CRC, 62 control | CRC 81, cohort 482                            | μmol/L                  | Adjusted for age, body mass index, alcohol intake (drinks per week), physical activity (MET-hours per week), family history of colorectal cancer, ethnicity (white, black, other), and participation in the OG or treatment arm of each clinical trial                                                        |
| 9     | Othman/2012   | USA<br>21000cohort, 198cases, 2897controls               | FM     | age45-75                 | CRC 198, cohort 2897                          | μmol/L                  | Adjusted for age, sex, race/ethnicity, history of colorectal polyps, family history of colorectal cancer, BMI (kg/m <sup>2</sup> ), moderate or vigorous physical activity, processed meat intake, pack-years of smoking, alcohol consumption, and mutual adjustment for IGF-1 and IGFBP-3, where appropriate |
| 10    | Parkh/2013    | USA<br>4615cohort, 136CRC, age66.8, follow up=37years    | FM     | age66.8                  | CRC 136, cohort 4615                          | pmol/L                  | Adjusted for age, sex, alcohol, smoking, and BMI (<25, 25-30, and >30). Smoking status (never, past, and current smoker) was based on self-reported data from each exam                                                                                                                                       |

# HOMA-IR

| Study | Country               | Design  | Gender              | Age(years) | Cancer types and No. of cases/controls/cohort       |                                     |
|-------|-----------------------|---------|---------------------|------------|-----------------------------------------------------|-------------------------------------|
| 1     | Limburg et al.2006    | Finland | nested case-control | M          | 50-69                                               | CRC:139,control:399,cohort:29133    |
| 2     | Gunter et al.2008     | USA     | nested case-control | F          | 50-79                                               | CRC:438,control:816,cohort:93676    |
| 3     | Yamamoto et al.2010   | Japan   | case-control        | F/M        | 53.8(mean)                                          | CRC:22,control:66                   |
| 4     | Chen et al.2012       | China   | case-control        | M          | early cancer:62,1,advanced cancer:61,8,control:58,3 | CRC:165,control:102                 |
| 5     | Kabat et al.2012      | UK      | nested case-control | F          | 50-79                                               | CRC:81,control:4821,cohort:4902     |
| 6     | Ollberding et al.2012 | USA     | nested case-control | F/M        | 45-75                                               | CRC:1954,control:2887,cohort:215000 |
| 7     | Parekh et al.2013     | USA     | cohort              | F/M        | 66.8(mean)                                          | CRC:136,cohort:615                  |
| 8     | Eranlan et al.2014    | Turkey  | case-control        | F/M        | CRC:58,control:82,9                                 | CRC:21,control:30                   |

  

| CRC-HOMA                                                                                                                                                                                                                                                                                                     |                                                                                                                                                                                                             | HOMA-IR was derived as fasting insulin x fasting glucose/22.5                                                                                                                  |                          |                         |                                                                                                                                                                         |                          |
|--------------------------------------------------------------------------------------------------------------------------------------------------------------------------------------------------------------------------------------------------------------------------------------------------------------|-------------------------------------------------------------------------------------------------------------------------------------------------------------------------------------------------------------|--------------------------------------------------------------------------------------------------------------------------------------------------------------------------------|--------------------------|-------------------------|-------------------------------------------------------------------------------------------------------------------------------------------------------------------------|--------------------------|
| <b>1</b>                                                                                                                                                                                                                                                                                                     | <b>Limburg/2006</b>                                                                                                                                                                                         | <b>Insulin, glucose, insulin resistance, and incident colorectal cancer in male smokers</b>                                                                                    |                          |                         |                                                                                                                                                                         |                          |
| Finland                                                                                                                                                                                                                                                                                                      | 134CRC,399controls,29133men                                                                                                                                                                                 | age:50-69                                                                                                                                                                      |                          |                         |                                                                                                                                                                         |                          |
| nested case-control                                                                                                                                                                                                                                                                                          | <b>Associations Between Fasting Insulin, Glucose, HOMA-IR and Incident Colorectal Cancer, Overall and by Anatomic Subsite</b>                                                                               |                                                                                                                                                                                |                          |                         |                                                                                                                                                                         |                          |
| men                                                                                                                                                                                                                                                                                                          | <b>HOMA-IR</b>                                                                                                                                                                                              |                                                                                                                                                                                |                          |                         |                                                                                                                                                                         |                          |
|                                                                                                                                                                                                                                                                                                              | Q1                                                                                                                                                                                                          | Q2                                                                                                                                                                             | Q3                       | Q4                      | P                                                                                                                                                                       |                          |
|                                                                                                                                                                                                                                                                                                              | <92                                                                                                                                                                                                         | 93-98                                                                                                                                                                          | 99-107                   | >107                    |                                                                                                                                                                         |                          |
| <b>all CRC</b>                                                                                                                                                                                                                                                                                               | 33/102                                                                                                                                                                                                      | 37/99                                                                                                                                                                          | 18/98                    | 46/100                  |                                                                                                                                                                         |                          |
| HR(age)                                                                                                                                                                                                                                                                                                      | 1.00 (ref.)                                                                                                                                                                                                 | 1.27 (0.71-2.26)                                                                                                                                                               | 0.67 (0.35-1.30)         | 1.85 (1.06-3.24)        | 0.12                                                                                                                                                                    |                          |
| HR(male)                                                                                                                                                                                                                                                                                                     | 1.00 (ref.)                                                                                                                                                                                                 | 1.30 (0.68-2.47)                                                                                                                                                               | 0.51 (0.23-1.16)         | <b>1.71 (0.77-3.78)</b> | 0.38                                                                                                                                                                    |                          |
| <b>Proximal CRC</b>                                                                                                                                                                                                                                                                                          | 14/102                                                                                                                                                                                                      | 12/99                                                                                                                                                                          | 6/98                     | 15/100                  |                                                                                                                                                                         |                          |
| HR(age)                                                                                                                                                                                                                                                                                                      | 1.00 (ref.)                                                                                                                                                                                                 | 1.11 (0.47-2.61)                                                                                                                                                               | 0.63 (0.22-1.79)         | 1.70 (0.73-3.97)        | 0.4                                                                                                                                                                     |                          |
| HR(male)                                                                                                                                                                                                                                                                                                     | 1.00 (ref.)                                                                                                                                                                                                 | 1.33 (0.52-3.42)                                                                                                                                                               | 0.47 (0.13-1.87)         | 1.96 (0.56-6.91)        | 0.54                                                                                                                                                                    |                          |
| <b>Distal CRC</b>                                                                                                                                                                                                                                                                                            | 19/102                                                                                                                                                                                                      | 25/99                                                                                                                                                                          | 12/98                    | 31/100                  |                                                                                                                                                                         |                          |
| HR(age)                                                                                                                                                                                                                                                                                                      | 1.00 (ref.)                                                                                                                                                                                                 | 1.36 (0.69-2.70)                                                                                                                                                               | 0.70 (0.32-1.52)         | 1.94 (1.01-3.73)        | 0.15                                                                                                                                                                    |                          |
| HR(male)                                                                                                                                                                                                                                                                                                     | 1.00 (ref.)                                                                                                                                                                                                 | 1.31 (0.69-2.67)                                                                                                                                                               | 0.53 (0.20-1.38)         | 1.58 (0.63-3.93)        | 0.53                                                                                                                                                                    |                          |
| Insulin analyses are adjusted for cigarette pack-years, body mass index, protein intake, fat intake, fiber intake, alcohol consumption, caloric intake, history of diabetes mellitus and occupational physical activity.                                                                                     |                                                                                                                                                                                                             |                                                                                                                                                                                |                          |                         |                                                                                                                                                                         |                          |
| <b>2</b>                                                                                                                                                                                                                                                                                                     | <b>Gunter/2008</b>                                                                                                                                                                                          | <b>Insulin, insulin-like growth factor-I, endogenous estradiol, and risk of colorectal cancer in postmenopausal women</b>                                                      |                          |                         |                                                                                                                                                                         |                          |
| US                                                                                                                                                                                                                                                                                                           | 93676 women, 438CRC,816controls                                                                                                                                                                             | age:50-79                                                                                                                                                                      |                          |                         |                                                                                                                                                                         |                          |
| nested case-control                                                                                                                                                                                                                                                                                          | <b>Age-adjusted and multivariate associations (HRs and 95% CI) of baseline IGF-1, IGFBP-3, insulin, glucose, HOMA-IR index, estradiol, hormone therapy use, and obesity with incident colorectal cancer</b> |                                                                                                                                                                                |                          |                         |                                                                                                                                                                         |                          |
| HOMA-IR                                                                                                                                                                                                                                                                                                      | <0.71                                                                                                                                                                                                       | 0.71-1.14                                                                                                                                                                      | 1.14-1.93                | >=1.93                  | p                                                                                                                                                                       |                          |
| cases/subcohort                                                                                                                                                                                                                                                                                              | 77/200                                                                                                                                                                                                      | 98/199                                                                                                                                                                         | 112/200                  | 140/200                 |                                                                                                                                                                         |                          |
| HR                                                                                                                                                                                                                                                                                                           | 1                                                                                                                                                                                                           | 1.25(0.86-1.81)                                                                                                                                                                | 1.35(0.94-1.94)          | <b>1.85(1.3-2.64)</b>   | 0.001                                                                                                                                                                   |                          |
| Adjusted for age only                                                                                                                                                                                                                                                                                        |                                                                                                                                                                                                             |                                                                                                                                                                                |                          |                         |                                                                                                                                                                         |                          |
| <b>3</b>                                                                                                                                                                                                                                                                                                     | <b>Yamamoto/2010</b>                                                                                                                                                                                        | <b>Visceral fat area and markers of insulin resistance in relation to colorectal neoplasia</b>                                                                                 |                          |                         |                                                                                                                                                                         |                          |
| Japan                                                                                                                                                                                                                                                                                                        | 22CRC,66controls                                                                                                                                                                                            | fasting                                                                                                                                                                        |                          |                         |                                                                                                                                                                         |                          |
| case-control                                                                                                                                                                                                                                                                                                 | <b>Associations of glucose, insulin, and HOMA-IR with the prevalence of adenoma and cancer in the colorectum</b>                                                                                            |                                                                                                                                                                                |                          |                         |                                                                                                                                                                         |                          |
|                                                                                                                                                                                                                                                                                                              | Q1                                                                                                                                                                                                          | Q2                                                                                                                                                                             | Q3                       | p                       |                                                                                                                                                                         |                          |
|                                                                                                                                                                                                                                                                                                              | 1.33                                                                                                                                                                                                        | 1.33-2.04                                                                                                                                                                      | >2.04                    |                         |                                                                                                                                                                         |                          |
| HOMA-IR                                                                                                                                                                                                                                                                                                      | 4/21                                                                                                                                                                                                        | 8/22                                                                                                                                                                           | 9/23                     |                         |                                                                                                                                                                         |                          |
| case/control                                                                                                                                                                                                                                                                                                 | 1                                                                                                                                                                                                           | 1.85 (0.62-6.62)                                                                                                                                                               | 1.89 (0.51-6.94)         | >0.2                    | Adjusted for smoking and alcohol drinking                                                                                                                               |                          |
| OR                                                                                                                                                                                                                                                                                                           | 1                                                                                                                                                                                                           | 2.60 (0.62-10.97)                                                                                                                                                              | 3.10 (0.71-13.54)        | 0.15                    | Additionally adjusted for BMI                                                                                                                                           |                          |
| adjusted OR1                                                                                                                                                                                                                                                                                                 | 1                                                                                                                                                                                                           | 2.63 (0.60-11.41)                                                                                                                                                              | <b>2.20 (0.45-10.81)</b> | >0.2                    |                                                                                                                                                                         |                          |
| adjusted OR2                                                                                                                                                                                                                                                                                                 | 1                                                                                                                                                                                                           |                                                                                                                                                                                |                          |                         |                                                                                                                                                                         |                          |
| <b>4</b>                                                                                                                                                                                                                                                                                                     | <b>Chen/2012</b>                                                                                                                                                                                            | <b>Association of plasma total and high-molecular-weight adiponectin with risk of colorectal cancer: an observational study in Chinese male</b>                                |                          |                         |                                                                                                                                                                         |                          |
| China                                                                                                                                                                                                                                                                                                        | 71early cancer,94advanced cancer, 102control                                                                                                                                                                | male                                                                                                                                                                           |                          |                         |                                                                                                                                                                         |                          |
| case-control                                                                                                                                                                                                                                                                                                 | case/control                                                                                                                                                                                                |                                                                                                                                                                                |                          |                         |                                                                                                                                                                         |                          |
| <b>early cancer</b>                                                                                                                                                                                                                                                                                          | <2.5, >=2.5                                                                                                                                                                                                 | low                                                                                                                                                                            | high                     | univariate analysis p   | Multi analysis p                                                                                                                                                        |                          |
| HOMA-IR                                                                                                                                                                                                                                                                                                      | 32/70                                                                                                                                                                                                       | 39/32                                                                                                                                                                          | 3.56(2.274-11.592)       | 0.002                   | 2.881(1.086-10.227)                                                                                                                                                     |                          |
| <b>advanced cancer</b>                                                                                                                                                                                                                                                                                       | <2.5, >=2.5                                                                                                                                                                                                 | 58/70                                                                                                                                                                          | 46/32                    | 2.08(0.934-7.673)       | 0.072                                                                                                                                                                   | <b>1.83(0.765-8.153)</b> |
| HOMA-IR                                                                                                                                                                                                                                                                                                      |                                                                                                                                                                                                             |                                                                                                                                                                                |                          |                         | 0.142                                                                                                                                                                   |                          |
| age, BMI, WHR, SBP, TG, fasting insulin, HOMA-IR, total adiponectin, HMW adiponectin, lifestyle characteristics, medications, family history of CRC and diabetes                                                                                                                                             |                                                                                                                                                                                                             |                                                                                                                                                                                |                          |                         |                                                                                                                                                                         |                          |
| <b>5</b>                                                                                                                                                                                                                                                                                                     | <b>Kabat/2012</b>                                                                                                                                                                                           | <b>A longitudinal study of serum insulin and glucose levels in relation to colorectal cancer risk among postmenopausal women</b>                                               |                          |                         |                                                                                                                                                                         |                          |
| UK                                                                                                                                                                                                                                                                                                           | 4802 women,81CRC,11.8years follow up, 4821control                                                                                                                                                           | age:64,3CRC,62,5control                                                                                                                                                        |                          |                         |                                                                                                                                                                         |                          |
| nested case-control                                                                                                                                                                                                                                                                                          | women                                                                                                                                                                                                       |                                                                                                                                                                                |                          |                         |                                                                                                                                                                         |                          |
| <b>Association of baseline serum insulin, glucose, and HOMA-IR with risk of colorectal and colon cancer in the Women's Health Initiative</b>                                                                                                                                                                 |                                                                                                                                                                                                             |                                                                                                                                                                                |                          |                         |                                                                                                                                                                         |                          |
| <b>Colorectal cancer</b>                                                                                                                                                                                                                                                                                     |                                                                                                                                                                                                             |                                                                                                                                                                                |                          |                         |                                                                                                                                                                         |                          |
|                                                                                                                                                                                                                                                                                                              | case/non-case                                                                                                                                                                                               | HR (age)                                                                                                                                                                       | HR (multi)               | case                    | HR (multi)                                                                                                                                                              |                          |
| HOMA-IR                                                                                                                                                                                                                                                                                                      | 27/1556                                                                                                                                                                                                     | 1                                                                                                                                                                              | 1                        | 21                      | 1                                                                                                                                                                       |                          |
| <31.2                                                                                                                                                                                                                                                                                                        | 23/1560                                                                                                                                                                                                     | 0.86(0.5-1.51)                                                                                                                                                                 | 0.93(0.52-1.66)          | 24                      | 1.02(0.55-1.89)                                                                                                                                                         |                          |
| 31.2-50.2                                                                                                                                                                                                                                                                                                    | 30/1553                                                                                                                                                                                                     | 1.18(0.7-1.98)                                                                                                                                                                 | <b>1.37(0.76-2.49)</b>   | 19                      | 1.27(0.7-2.29)                                                                                                                                                          |                          |
| >=50.2                                                                                                                                                                                                                                                                                                       |                                                                                                                                                                                                             | 0.54                                                                                                                                                                           | 0.3                      |                         | 0.23                                                                                                                                                                    |                          |
| P                                                                                                                                                                                                                                                                                                            |                                                                                                                                                                                                             |                                                                                                                                                                                | 1.001(0.995-1.007)       |                         | 1.002(0.995-1.009)                                                                                                                                                      |                          |
| continuous                                                                                                                                                                                                                                                                                                   |                                                                                                                                                                                                             |                                                                                                                                                                                |                          |                         |                                                                                                                                                                         |                          |
| Adjusted for age, body mass index, alcohol intake (drinks per week), physical activity (MET-hours per week), family history of colorectal cancer, ethnicity (white, black, other), and participation in the OS or treatment arm of each clinical trial.                                                      |                                                                                                                                                                                                             |                                                                                                                                                                                |                          |                         |                                                                                                                                                                         |                          |
| <b>6</b>                                                                                                                                                                                                                                                                                                     | <b>Ollberding/2012</b>                                                                                                                                                                                      | <b>Genetic variants, prediagnostic circulating levels of insulin-like growth factors, insulin, and glucose and the risk of colorectal cancer: the Multiethnic Cohort study</b> |                          |                         |                                                                                                                                                                         |                          |
| US                                                                                                                                                                                                                                                                                                           | 21500cohort, 1954cases, 2597controls                                                                                                                                                                        | age:45-75                                                                                                                                                                      |                          |                         |                                                                                                                                                                         |                          |
| nested case-control                                                                                                                                                                                                                                                                                          | <b>ORs and 95% CIs for tertiles of circulating IGF system biomarkers, insulin, glucose, and colorectal cancer</b>                                                                                           |                                                                                                                                                                                |                          |                         |                                                                                                                                                                         |                          |
|                                                                                                                                                                                                                                                                                                              | cases/controls                                                                                                                                                                                              | Q1                                                                                                                                                                             | Q2                       | Q3                      | p                                                                                                                                                                       |                          |
| HOMA-IR                                                                                                                                                                                                                                                                                                      | 258/1,701                                                                                                                                                                                                   | 0.636                                                                                                                                                                          | 1.296                    | 2.935                   | 0.004                                                                                                                                                                   |                          |
| model 1                                                                                                                                                                                                                                                                                                      | 249/1,571                                                                                                                                                                                                   | 1                                                                                                                                                                              | 1.06 (0.75-1.48)         | 1.53 (1.12-2.16)        | 0.1                                                                                                                                                                     |                          |
| model 3                                                                                                                                                                                                                                                                                                      |                                                                                                                                                                                                             |                                                                                                                                                                                | 0.94 (0.66-1.34)         | <b>1.28 (0.88-1.85)</b> |                                                                                                                                                                         |                          |
| Adjusted for age, sex, and race/ethnicity                                                                                                                                                                                                                                                                    |                                                                                                                                                                                                             |                                                                                                                                                                                |                          |                         |                                                                                                                                                                         |                          |
| Adjusted for age, sex, race/ethnicity, history of colorectal polyp, family history of colorectal cancer, BMI (kg/m <sup>2</sup> ), moderate or vigorous physical activity, processed meat intake, pack-years of smoking, alcohol consumption, and mutual adjustment for IGF-1 and IGFBP-3, where appropriate |                                                                                                                                                                                                             |                                                                                                                                                                                |                          |                         |                                                                                                                                                                         |                          |
| <b>7</b>                                                                                                                                                                                                                                                                                                     | <b>Parekh/2013</b>                                                                                                                                                                                          | <b>Metabolic dysregulation of the insulin-glucose axis and risk of obesity-related cancers in the Framingham heart study-offspring cohort (1971-2008)</b>                      |                          |                         |                                                                                                                                                                         |                          |
| USA                                                                                                                                                                                                                                                                                                          | 4615cohort,136CRC,age66.8, follow up-37years                                                                                                                                                                |                                                                                                                                                                                |                          |                         |                                                                                                                                                                         |                          |
| cohort                                                                                                                                                                                                                                                                                                       | <b>Exposure to markers of insulin-glucose metabolism and risk of commonly diagnosed obesity-related cancer sites</b>                                                                                        |                                                                                                                                                                                |                          |                         |                                                                                                                                                                         |                          |
|                                                                                                                                                                                                                                                                                                              | cases/cohort                                                                                                                                                                                                | HR (age)                                                                                                                                                                       | HR (adjusted)            |                         |                                                                                                                                                                         |                          |
| HOMA-IR                                                                                                                                                                                                                                                                                                      | 71/428                                                                                                                                                                                                      | 1                                                                                                                                                                              | 1                        |                         |                                                                                                                                                                         |                          |
| <2.6                                                                                                                                                                                                                                                                                                         |                                                                                                                                                                                                             | 2.39 (1.49-3.85)                                                                                                                                                               | 2.36 (1.40-4.00)         |                         | Adjusted for age, sex, alcohol, smoking, and BMI (<25, 25-30, and >30), Smoking status (never, past, and current smoker) was based on self-reported data from each exam |                          |
| >2.6                                                                                                                                                                                                                                                                                                         |                                                                                                                                                                                                             |                                                                                                                                                                                |                          |                         |                                                                                                                                                                         |                          |
| <b>8</b>                                                                                                                                                                                                                                                                                                     | <b>Eranlan/2014</b>                                                                                                                                                                                         | <b>IGF-I levels and visceral fat accumulation in colonic neoplasia</b>                                                                                                         |                          |                         |                                                                                                                                                                         |                          |
| Turkey                                                                                                                                                                                                                                                                                                       | 21CRC,30controls                                                                                                                                                                                            |                                                                                                                                                                                |                          |                         |                                                                                                                                                                         |                          |
| case-control                                                                                                                                                                                                                                                                                                 | <b>Factors associated with colorectal adenoma and colorectal carcinoma in patients assessed by logistic regression analysis.</b>                                                                            |                                                                                                                                                                                |                          |                         |                                                                                                                                                                         |                          |
|                                                                                                                                                                                                                                                                                                              | <b>colorectal carcinoma</b>                                                                                                                                                                                 |                                                                                                                                                                                |                          |                         |                                                                                                                                                                         |                          |
| HOMA-IR                                                                                                                                                                                                                                                                                                      | 1.05(0.77-1.43)                                                                                                                                                                                             | 0.73                                                                                                                                                                           |                          |                         |                                                                                                                                                                         |                          |



# C-peptide

| Study                                                                                                                                                                                                                                                                                                                        | Country               | Design                   | Gender                     | Age (years)             | Cancer types and No. of cases/controls/cohort | Unit of C-peptide                                           |
|------------------------------------------------------------------------------------------------------------------------------------------------------------------------------------------------------------------------------------------------------------------------------------------------------------------------------|-----------------------|--------------------------|----------------------------|-------------------------|-----------------------------------------------|-------------------------------------------------------------|
| 1                                                                                                                                                                                                                                                                                                                            | USA                   | nested case-control      | F                          | 35-65                   | CRC102,control200,cohort14275                 | pmol/ml                                                     |
| 2                                                                                                                                                                                                                                                                                                                            | USA                   | nested case-control      | M                          | 40-84                   | CRC176,control294,cohort14916                 | pmol/ml                                                     |
| 3                                                                                                                                                                                                                                                                                                                            | Norway                | nested case-control      | M                          | 45(years)               | CC235,RC143,control179,cohort40000            | ng/ml                                                       |
| 4                                                                                                                                                                                                                                                                                                                            | USA                   | nested case-control      | F                          | 30-55                   | CRC182,control300,cohort32826                 | ng/ml                                                       |
| 5                                                                                                                                                                                                                                                                                                                            | 10 European countries | nested case-control      | F/M                        | 36.7-76.9               | CRC1078,control1078,cohort520000              | ng/ml                                                       |
| 6                                                                                                                                                                                                                                                                                                                            | Japan                 | nested case-control      | F/M                        | 40-69                   | CRC375,control760,cohort38373                 | ng/ml                                                       |
| 7                                                                                                                                                                                                                                                                                                                            | Sweden                | nested case-control      | F/M                        | 50-70                   | CRC306,control495,cohort104461                | ng/ml                                                       |
| 8                                                                                                                                                                                                                                                                                                                            | Japan                 | case-control             | F/M                        | CRC63.7,control63.5     | CRC115,control115                             | x                                                           |
| 9                                                                                                                                                                                                                                                                                                                            | USA                   | nested case-control      | M                          | 40-75                   | CRC499,control992,cohort51129                 | x                                                           |
| <b>1</b> 3.02ng/ml=1pmol/ml                                                                                                                                                                                                                                                                                                  |                       |                          |                            |                         |                                               |                                                             |
| <b>USA</b> 14275cohort, 102CRC, 200controls C-peptide, pmol/ml                                                                                                                                                                                                                                                               |                       |                          |                            |                         |                                               |                                                             |
| nested case-control                                                                                                                                                                                                                                                                                                          |                       |                          |                            |                         |                                               |                                                             |
| Odds ratios (ORs) of cancer of the colorectum or of the colon for quintiles of serum insulin-like growth factor (IGF)-1, IGF-binding proteins (IGFBPs), C-peptide, and body mass index (BMI)                                                                                                                                 |                       |                          |                            |                         |                                               |                                                             |
| C-peptide                                                                                                                                                                                                                                                                                                                    | Q1                    | Q2                       | Q3                         | Q4                      | Q5                                            | p                                                           |
| Colorectum                                                                                                                                                                                                                                                                                                                   | 1                     | 0.56 (0.22-1.38)         | 1.92 (0.90-4.09)           | 1.26 (0.53-3.02)        | <b>2.92 (1.26-6.75)</b>                       | 0.001                                                       |
| OR                                                                                                                                                                                                                                                                                                                           | 17/44                 | 11/47                    | 25/35                      | 19/43                   | 30/30                                         |                                                             |
| mean exposure                                                                                                                                                                                                                                                                                                                | 0.41                  | 0.57                     | 0.74                       | 1.01                    | 1.67                                          |                                                             |
| colon                                                                                                                                                                                                                                                                                                                        | 1                     | 0.41 (0.13-1.27)         | 1.42 (0.60-3.34)           | 1.99 (0.68-5.85)        | 3.96 (1.49-10.50)                             | <.001                                                       |
| OR                                                                                                                                                                                                                                                                                                                           | 13/32                 | 5/36                     | 17/30                      | 16/27                   | 24/21                                         |                                                             |
| mean exposure                                                                                                                                                                                                                                                                                                                | 0.42                  | 0.55                     | 0.72                       | 0.99                    | 1.73                                          |                                                             |
| <b>2</b> <b>Ma/2004</b> A prospective study of plasma C-peptide and colorectal cancer risk in men                                                                                                                                                                                                                            |                       |                          |                            |                         |                                               |                                                             |
| US 14916cohort, 176cases, 294controls age40-84 C-peptide, pmol/ml                                                                                                                                                                                                                                                            |                       |                          |                            |                         |                                               |                                                             |
| nested case-control Association between the risk for colorectal cancer and quintiles of plasma C-peptide concentration                                                                                                                                                                                                       |                       |                          |                            |                         |                                               |                                                             |
| C-peptide, pmol/L                                                                                                                                                                                                                                                                                                            | Q1                    | Q2                       | Q3                         | Q4                      | Q5                                            | p                                                           |
| C-peptide, pmol/L                                                                                                                                                                                                                                                                                                            | 0.14 (0.06-0.20)      | 0.24 (0.20-0.30)         | 0.38 (0.30-0.44)           | 0.54 (0.44-0.73)        | 0.97 (0.74-1.02)                              |                                                             |
| cases/control                                                                                                                                                                                                                                                                                                                | 19/58                 | 29/59                    | 46/59                      | 39/59                   | 43/59                                         |                                                             |
| RR* (95% CI)                                                                                                                                                                                                                                                                                                                 | 1.0 (referent)        | 1.4 (0.7 to 3.0)         | 2.5 (1.2 to 5.2)           | 2.3 (1.1 to 4.7)        | 2.5 (1.1 to 5.6)                              | 0.06 age and smoking status and adjusted for fasting status |
| Multivariable RR                                                                                                                                                                                                                                                                                                             | 1.0 (referent)        | 1.5 (0.7 to 3.0)         | 2.2 (1.0 to 4.8)           | 1.6 (0.7 to 3.5)        | <b>2.5 (1.2 to 5.6)</b>                       | 0.04 age and smoking status and adjusted for fasting status |
| Overall follow-up BMI, alcohol consumption, vigorous exercise, and aspirin assignment                                                                                                                                                                                                                                        |                       |                          |                            |                         |                                               |                                                             |
| number of markers for insulin resistance defined as the number of any of the following four factors                                                                                                                                                                                                                          |                       |                          |                            |                         |                                               |                                                             |
| insulin-like growth factor 1 (IGF-I) and IGF binding protein 3 (IGFBP-3)                                                                                                                                                                                                                                                     |                       |                          |                            |                         |                                               |                                                             |
| Excluding first 5 years of follow-up                                                                                                                                                                                                                                                                                         |                       |                          |                            |                         |                                               |                                                             |
| cases/control                                                                                                                                                                                                                                                                                                                | 16/50                 | 22/42                    | 40/50                      | 24/43                   | 35/48                                         |                                                             |
| RR (95% CI)                                                                                                                                                                                                                                                                                                                  | 1.0 (referent)        | 1.6 (0.7 to 3.8)         | 2.8 (1.2 to 6.3)           | 2.1 (0.9 to 4.8)        | 3.3 (1.4 to 8.2)                              | 0.03                                                        |
| Multivariable RR                                                                                                                                                                                                                                                                                                             | 1.0 (referent)        | 1.6 (0.7 to 3.8)         | 2.6 (1.1 to 6.0)           | 2.0 (0.8 to 4.7)        | 3.4 (1.3 to 8.8)                              | 0.03                                                        |
| age and smoking status and adjusted for fasting status                                                                                                                                                                                                                                                                       |                       |                          |                            |                         |                                               |                                                             |
| age and smoking status and adjusted for fasting status                                                                                                                                                                                                                                                                       |                       |                          |                            |                         |                                               |                                                             |
| BMI, alcohol consumption, vigorous exercise, and aspirin assignment                                                                                                                                                                                                                                                          |                       |                          |                            |                         |                                               |                                                             |
| <b>3</b> <b>Stattin/2004</b> Obesity and colon cancer: does leptin provide a link?                                                                                                                                                                                                                                           |                       |                          |                            |                         |                                               |                                                             |
| Norway 235CC, 149CC, 370controls age45 follow up 17years C-peptide, ng/ml                                                                                                                                                                                                                                                    |                       |                          |                            |                         |                                               |                                                             |
| nested case-control ODDS RATIO AND 95% CONFIDENCE INTERVAL OF CANCER OF THE COLON AND OF THE RECTUM FOR QUANTILES OF C-PEPTIDE                                                                                                                                                                                               |                       |                          |                            |                         |                                               |                                                             |
| Colorectum                                                                                                                                                                                                                                                                                                                   | Q1                    | Q2                       | Q3                         | Q4                      | Q5                                            | p                                                           |
| Colorectum                                                                                                                                                                                                                                                                                                                   | <0.18                 | 0.18-0.31                | 0.31-0.7                   | >0.7                    |                                               |                                                             |
| cases/control                                                                                                                                                                                                                                                                                                                | 52/65                 | 63/54                    | 60/58                      | 60/58                   |                                               |                                                             |
| OR(adjusted)                                                                                                                                                                                                                                                                                                                 | 1                     | 1.68 (0.93-3.05)         | 1.53 (0.82-2.86)           | 1.81 (0.87-4.86)        | 0.19                                          |                                                             |
| OR(adjusted) left colon                                                                                                                                                                                                                                                                                                      | 1                     | 1.69 (0.93-3.09)         | 1.53 (0.82-2.86)           | <b>1.74 (0.65-4.69)</b> | 0.21                                          |                                                             |
| right colon                                                                                                                                                                                                                                                                                                                  | 24/25                 | 25/25                    | 24/25                      | 29/24                   |                                               |                                                             |
| OR(adjusted)                                                                                                                                                                                                                                                                                                                 | 1                     | 1.04 (0.49-2.23)         | 1.12 (0.44-2.82)           | 3.35 (0.29-38.6)        | 0.65                                          |                                                             |
| OR(adjusted) left colon                                                                                                                                                                                                                                                                                                      | 1                     | 1.04 (0.49-2.23)         | 1.12 (0.44-2.82)           | 3.35 (0.29-38.6)        | 0.65                                          |                                                             |
| Right colon                                                                                                                                                                                                                                                                                                                  | 31/32                 | 29/34                    | 34/29                      | 32/31                   |                                               |                                                             |
| OR(adjusted)                                                                                                                                                                                                                                                                                                                 | 1                     | 0.91 (0.41-2.02)         | 1.32 (0.57-3.07)           | 1.31 (0.41-4.17)        | 0.47                                          |                                                             |
| OR(adjusted) left colon                                                                                                                                                                                                                                                                                                      | 1                     | 0.91 (0.40-2.03)         | 1.27 (0.54-2.98)           | 1.23 (0.38-3.97)        | 0.55                                          |                                                             |
| Rectum                                                                                                                                                                                                                                                                                                                       | <0.18                 | 0.18-0.36                | 0.36-1.06                  | >=1.06                  |                                               |                                                             |
| cases/control                                                                                                                                                                                                                                                                                                                | 37/34                 | 38/34                    | 33/38                      | 35/37                   |                                               |                                                             |
| OR(adjusted)                                                                                                                                                                                                                                                                                                                 | 1                     | 0.89 (0.41-1.95)         | 0.61 (0.24-1.55)           | 0.44 (0.10-1.99)        | 0.21                                          |                                                             |
| OR(adjusted) left colon                                                                                                                                                                                                                                                                                                      | 1                     | 0.90 (0.41-1.98)         | 0.63 (0.24-1.68)           | <b>0.46 (0.10-2.17)</b> | 0.27                                          |                                                             |
| 1 RR from conditional logistic regression                                                                                                                                                                                                                                                                                    |                       |                          |                            |                         |                                               |                                                             |
| 2 RR from conditional logistic regression additionally adjusted for BMI, physical activity, pack-years smoked, and alcohol intake as continuous variables, family history of colorectal cancer, aspirin use, history of screening, menopausal status, and use of postmenopausal hormones                                     |                       |                          |                            |                         |                                               |                                                             |
| <b>4</b> <b>Weir/2005</b> A prospective study of C-peptide, insulin-like growth factor-1, insulin-like growth factor binding protein-1, and the risk of colorectal cancer in women                                                                                                                                           |                       |                          |                            |                         |                                               |                                                             |
| US 3282women,182CRC,350controls follow up 10years age30-55 C-peptide, ng/ml                                                                                                                                                                                                                                                  |                       |                          |                            |                         |                                               |                                                             |
| nested case-control RR and 95% CI of colorectal cancer according to quartiles of plasma levels of C-peptide, IGFBP-1, and HbA1c in the Nurses' Health Study, 1989-2000                                                                                                                                                       |                       |                          |                            |                         |                                               |                                                             |
| C-peptide                                                                                                                                                                                                                                                                                                                    | Q1                    | Q2                       | Q3                         | Q4                      | Q5                                            | p                                                           |
| C-peptide                                                                                                                                                                                                                                                                                                                    | 0.9                   | 1.4                      | 2                          | 3.6                     |                                               |                                                             |
| CRC                                                                                                                                                                                                                                                                                                                          | 35/87                 | 50/86                    | 54/89                      | 43/88                   |                                               |                                                             |
| RR1                                                                                                                                                                                                                                                                                                                          | 1                     | 1.46 (0.86-2.45)         | 1.50 (0.88-2.57)           | 1.22 (0.70-2.13)        |                                               |                                                             |
| RR2                                                                                                                                                                                                                                                                                                                          | 1                     | 1.46 (0.84-2.53)         | 1.41 (0.79-2.55)           | <b>1.17 (0.63-2.20)</b> | 0.94                                          |                                                             |
| colon                                                                                                                                                                                                                                                                                                                        | 23/70                 | 41/85                    | 42/71                      | 34/82                   |                                               |                                                             |
| RR1                                                                                                                                                                                                                                                                                                                          | 1                     | 1.88 (1.04-3.42)         | 1.83 (0.98-3.48)           | 1.65 (0.89-3.09)        |                                               |                                                             |
| RR2                                                                                                                                                                                                                                                                                                                          | 1                     | 1.88 (1.00-3.56)         | 1.85 (0.92-3.74)           | 1.76 (0.95-3.63)        | 0.38                                          |                                                             |
| 1 RR from conditional logistic regression                                                                                                                                                                                                                                                                                    |                       |                          |                            |                         |                                               |                                                             |
| 2 RR from conditional logistic regression additionally adjusted for BMI, physical activity, pack-years smoked, and alcohol intake as continuous variables, family history of colorectal cancer, aspirin use, history of screening, menopausal status, and use of postmenopausal hormones                                     |                       |                          |                            |                         |                                               |                                                             |
| <b>5</b> <b>Jensab/2007</b> Serum C-peptide, IGFBP-1 and IGFBP-2 and risk of colon and rectal cancers in the European Prospective Investigation into Cancer and Nutrition                                                                                                                                                    |                       |                          |                            |                         |                                               |                                                             |
| 10 western European countries 1078CRC,1078controls,520000cohort C-peptide, ng/ml                                                                                                                                                                                                                                             |                       |                          |                            |                         |                                               |                                                             |
| nested case-control ASSOCIATION OF SERUM C-PEPTIDE WITH CANCER RISK IN THE COLON, RECTUM AND COLON AND RECTUM COMBINED, BY FASTING STATUS                                                                                                                                                                                    |                       |                          |                            |                         |                                               |                                                             |
| C-peptide                                                                                                                                                                                                                                                                                                                    | cases/control         | crude OR                 | adjusted OR                | cases/control           | crude OR                                      | adjusted OR                                                 |
| colon                                                                                                                                                                                                                                                                                                                        | 1                     | 1                        | 1                          | 1                       | 1                                             | 1                                                           |
| 1                                                                                                                                                                                                                                                                                                                            | 104/121               | 1                        | 1                          | 27/32                   | 1                                             | 1                                                           |
| 2                                                                                                                                                                                                                                                                                                                            | 139/150               | 1.08 (0.78-1.55)         | 1.05 (0.73-1.50)           | 40/41                   | 1.15 (0.68-2.26)                              | 1.20 (0.59-2.45)                                            |
| 3                                                                                                                                                                                                                                                                                                                            | 120/138               | 1.07 (0.75-1.55)         | 1.06 (0.72-1.54)           | 32/38                   | 0.98 (0.48-2.04)                              | 0.98 (0.47-2.06)                                            |
| 4                                                                                                                                                                                                                                                                                                                            | 143/136               | 1.29 (0.89-1.86)         | 1.17 (0.80-1.71)           | 38/36                   | 1.27 (0.62-2.62)                              | 1.22 (0.56-2.67)                                            |
| 5                                                                                                                                                                                                                                                                                                                            | 169/131               | 1.67 (1.14-2.46)         | 1.48 (0.98-2.25)           | 41/31                   | 1.66 (0.83-3.45)                              | 1.27 (0.60-2.71)                                            |
| p                                                                                                                                                                                                                                                                                                                            |                       | <0.01                    | <0.01                      |                         | 0.18                                          | 0.01                                                        |
| rectum                                                                                                                                                                                                                                                                                                                       | 1                     | 1                        | 1                          | 1                       | 1                                             | 1                                                           |
| 1                                                                                                                                                                                                                                                                                                                            | 78/93                 | 1                        | 1                          | 15/18                   | 1                                             | 1                                                           |
| 2                                                                                                                                                                                                                                                                                                                            | 71/68                 | 1.26 (0.80-1.99)         | 1.25 (0.79-1.99)           | 12/11                   | 1.37 (0.46-4.10)                              | 1.25 (0.41-3.83)                                            |
| 3                                                                                                                                                                                                                                                                                                                            | 94/80                 | 1.43 (0.93-2.20)         | 1.29 (0.82-2.04)           | 20/13                   | 1.99 (0.60-5.72)                              | 1.62 (0.49-5.39)                                            |
| 4                                                                                                                                                                                                                                                                                                                            | 68/81                 | 1.02 (0.65-1.59)         | 0.94 (0.59-1.51)           | 14/16                   | 0.92 (0.30-2.80)                              | 0.86 (0.20-2.31)                                            |
| 5                                                                                                                                                                                                                                                                                                                            | 93/82                 | 1.42 (0.90-2.25)         | 1.25 (0.76-2.03)           | 15/18                   | 1.11 (0.38-3.25)                              | 0.78 (0.23-2.58)                                            |
| p                                                                                                                                                                                                                                                                                                                            |                       | 0.35                     | 0.78                       |                         | 0.86                                          | 0.16                                                        |
| colorectum                                                                                                                                                                                                                                                                                                                   | 1                     | 1                        | 1                          | 1                       | 1                                             | 1                                                           |
| 1                                                                                                                                                                                                                                                                                                                            | 182/214               | 1                        | 1                          | 42/50                   | 1                                             | 1                                                           |
| 2                                                                                                                                                                                                                                                                                                                            | 210/218               | 1.14 (0.87-1.51)         | 1.11 (0.84-1.47)           | 52/52                   | 1.20 (0.68-2.12)                              | 1.20 (0.67-2.16)                                            |
| 3                                                                                                                                                                                                                                                                                                                            | 214/216               | 1.20 (0.91-1.59)         | 1.13 (0.85-1.51)           | 52/51                   | 1.24 (0.65-2.21)                              | 1.11 (0.61-2.03)                                            |
| 4                                                                                                                                                                                                                                                                                                                            | 211/217               | 1.19 (0.90-1.58)         | 1.09 (0.81-1.46)           | 52/52                   | 1.22 (0.67-2.21)                              | 1.09 (0.57-2.05)                                            |
| 5                                                                                                                                                                                                                                                                                                                            | 261/213               | 1.56 (1.16-2.09)         | 1.37 (1.00-1.88)           | 56/49                   | 1.41 (0.78-2.55)                              | <b>1.22 (0.64-2.35)</b>                                     |
| p                                                                                                                                                                                                                                                                                                                            |                       | <0.01                    | 0.03                       |                         | 0.31                                          | 0.01                                                        |
| fasting subjects                                                                                                                                                                                                                                                                                                             | Q1                    | Q2                       | Q3                         | Q4                      | Q5                                            |                                                             |
| fasting subjects                                                                                                                                                                                                                                                                                                             | <2.2                  | 2.2-2.8                  | 2.9-3.2                    | 3.3-3.8                 | >=3.8                                         | ng/ml                                                       |
| non-fasting subj                                                                                                                                                                                                                                                                                                             | Q1                    | Q2                       | Q3                         | Q4                      | Q5                                            |                                                             |
| non-fasting subj                                                                                                                                                                                                                                                                                                             | <2.7                  | 2.7-3.8                  | 3.9-5                      | 5-6.8                   | >=6.8                                         | ng/ml                                                       |
| Values for Crude are OR (95%CI) derived from univariate models conditioned on the matching factors and further adjusted for body mass index and physical activity                                                                                                                                                            |                       |                          |                            |                         |                                               |                                                             |
| Values for Adjusted are OR (95% CI) derived from univariate models conditioned on the matching factors and further adjusted for body mass index and physical activity                                                                                                                                                        |                       |                          |                            |                         |                                               |                                                             |
| <b>6</b> <b>Ohtani/2007</b> Plasma C-peptide, insulin-like growth factor-1, insulin-like growth factor binding proteins and risk of colorectal cancer in a nested case-control study: the Japan public health center-based prospective study                                                                                 |                       |                          |                            |                         |                                               |                                                             |
| Japan C,750control,3837cohort 11.5year follow up C-peptide, ng/ml                                                                                                                                                                                                                                                            |                       |                          |                            |                         |                                               |                                                             |
| nested case-control ODDS RATIO (OR) AND 95% CONFIDENCE INTERVAL (CI) OF COLORECTAL CANCER FOR BASELINE CONCENTRATIONS OF PLASMA C-PEPTIDE, INSULIN-LIKE GROWTH FACTOR-1 (IGF-1) AND INSULIN-LIKE GROWTH FACTOR BINDING PROTEINS                                                                                              |                       |                          |                            |                         |                                               |                                                             |
| Colorectum                                                                                                                                                                                                                                                                                                                   | Q1                    | Q2                       | Q3                         | Q4                      | p                                             |                                                             |
| Men                                                                                                                                                                                                                                                                                                                          | 1.1                   | 1.9                      | 3.3                        | 5.6                     |                                               |                                                             |
| c-peptide                                                                                                                                                                                                                                                                                                                    | 25/86                 | 49/92                    | 50/93                      | 56/88                   |                                               |                                                             |
| OR                                                                                                                                                                                                                                                                                                                           | 1                     | 2.3 (1.2-4.5)            | 2.8 (1.3-6.1)              | <b>3.2 (1.4-7.6)</b>    | 0.0072                                        |                                                             |
| women                                                                                                                                                                                                                                                                                                                        | 1.1                   | 1.9                      | 2.8                        | 4.8                     |                                               |                                                             |
| c-peptide                                                                                                                                                                                                                                                                                                                    | 51/83                 | 32/77                    | 46/93                      | 46/88                   |                                               |                                                             |
| OR                                                                                                                                                                                                                                                                                                                           | 1                     | 0.71 (0.38-1.3)          | 0.75 (0.40-1.4)            | <b>0.78 (0.38-1.6)</b>  |                                               |                                                             |
| Colon                                                                                                                                                                                                                                                                                                                        | 1                     | 2.1 (0.96-4.6)           | 2.6 (1.0-6.3)              | 3.5 (1.2-10.0)          | 0.025                                         |                                                             |
| Men                                                                                                                                                                                                                                                                                                                          | 1                     | 0.65 (0.29-1.4)          | 0.92 (0.41-2.0)            | 0.72 (0.28-1.8)         | 0.54                                          |                                                             |
| women                                                                                                                                                                                                                                                                                                                        | 1                     | 1.8 (0.40-8.0)           | 3.8 (0.83-18)              | 2.2 (0.47-10.0)         | 0.24                                          |                                                             |
| Men                                                                                                                                                                                                                                                                                                                          | 1                     | 0.88 (0.34-2.3)          | 0.46 (0.14-1.5)            | 0.76 (0.23-2.5)         | 0.82                                          |                                                             |
| women                                                                                                                                                                                                                                                                                                                        | 1                     | 1.8 (0.40-8.0)           | 3.8 (0.83-18)              | 2.2 (0.47-10.0)         | 0.24                                          |                                                             |
| women                                                                                                                                                                                                                                                                                                                        | 1                     | 0.88 (0.34-2.3)          | 0.46 (0.14-1.5)            | 0.76 (0.23-2.5)         | 0.82                                          |                                                             |
| ORs estimated using matched pairs with adjustment for pack-years of smoking (continuous), alcohol consumption (g/week ethanol, continuous), body mass index (continuous), physical exercise (less than once a week, or once a week or more), family history of colorectal cancer and following plasma measurements mutually. |                       |                          |                            |                         |                                               |                                                             |
| <b>7</b> <b>Stocks/2008</b> Components of the metabolic syndrome and colorectal cancer risk: a prospective study                                                                                                                                                                                                             |                       |                          |                            |                         |                                               |                                                             |
| Sweden 306CRC,595control,age50-60 C-peptide, ng/ml                                                                                                                                                                                                                                                                           |                       |                          |                            |                         |                                               |                                                             |
| nested case-control Odds ratios for colorectal cancer by quartiles                                                                                                                                                                                                                                                           |                       |                          |                            |                         |                                               |                                                             |
| C-peptide ng/ml                                                                                                                                                                                                                                                                                                              | Q1                    | Q2                       | Q3                         | Q4                      | p                                             |                                                             |
| fasting <4h                                                                                                                                                                                                                                                                                                                  | <2.6                  | 2.6-3.7                  | 3.7-5.2                    | >5.2                    |                                               |                                                             |
| fasting >4h                                                                                                                                                                                                                                                                                                                  | <1.5                  | 1.5-1.9                  | 1.9-2.5                    | >2.5                    |                                               |                                                             |
| cases/control                                                                                                                                                                                                                                                                                                                | 74/136                | 72/136                   | 72/137                     | 73/138                  |                                               |                                                             |
| OR                                                                                                                                                                                                                                                                                                                           | 1                     | 0.94 (0.63-1.40)         | 0.93 (0.62-1.39)           | <b>0.94 (0.62-1.41)</b> | 0.82                                          |                                                             |
| <b>8</b> <b>Nakajima/2010</b> Adipocytokines as new promising markers of colorectal tumors: adiponectin for colorectal adenoma, and resistin and visfatin for colorectal cancer                                                                                                                                              |                       |                          |                            |                         |                                               |                                                             |
| Japan 115CRC,115control,age60-75 C-peptide, ng/ml                                                                                                                                                                                                                                                                            |                       |                          |                            |                         |                                               |                                                             |
| Univariate and multivariate analysis of patients with colorectal cancer and controls                                                                                                                                                                                                                                         |                       |                          |                            |                         |                                               |                                                             |
| C-peptide                                                                                                                                                                                                                                                                                                                    | OR                    | p                        | OR                         | p                       |                                               |                                                             |
| C-peptide                                                                                                                                                                                                                                                                                                                    | 1.711 (0.555-0.920)   | 0.01                     | <b>0.983 (0.663-1.458)</b> | 0.93                    |                                               |                                                             |
| <b>9</b> <b>Wu/2011</b> Interactions between plasma levels of 25-hydroxyvitamin D, insulin-like growth factor (IGF)-1 and C-peptide with risk of colorectal cancer                                                                                                                                                           |                       |                          |                            |                         |                                               |                                                             |
| US multi,491cases,952control age40-75                                                                                                                                                                                                                                                                                        |                       |                          |                            |                         |                                               |                                                             |
| nested case-control Multivariable adjusted odds ratios (OR) of colorectal and colon cancer by median of plasma insulin level, HPS and NHS combined                                                                                                                                                                           |                       |                          |                            |                         |                                               |                                                             |
| colorectal cancer                                                                                                                                                                                                                                                                                                            | low                   | high                     | low                        | high                    |                                               |                                                             |
| cases/control                                                                                                                                                                                                                                                                                                                | 197/455               | 277/460                  | 140/337                    | 211/339                 |                                               |                                                             |
| OR                                                                                                                                                                                                                                                                                                                           | 1                     | <b>1.371 (1.05-1.78)</b> | 1                          | 1.158 (1.16-2.16)       |                                               |                                                             |
| Models for C-Peptide only included participants without self-reported diabetes mellitus.                                                                                                                                                                                                                                     |                       |                          |                            |                         |                                               |                                                             |
